# Supplementary material for: Single-cell RNA-seq reveals breast cancer heterogeneity and identifies TCP1 as a therapeutic target in breast cancer
Source: PeerJ journal article supplement (doi:10.7717/peerj.20451), 2025-12-09
Supplement: Table.xlsx [file Table.xlsx]

## Sheet: Table S1
Table S1: The clinical information of samples included in the present study.
GSE1	GSE	samp	Patient	Description	Source	Condition	Menopause	Parity	Gender
GSM4909253	GSM4909253	N-0092-total	0092	Normal tissue, total cells	Total	Normal	Pre	Nulliparous	Female
GSM4909254	GSM4909254	N-0019-total	0019	Normal tissue, total cells	Total	Normal	Pre	Nulliparous	Female
GSM4909255	GSM4909255	N-0280-epi	0280	Normal tissue, epithelial cells	Epithelial	Normal	Pre	Nulliparous	Female
GSM4909256	GSM4909256	N-0093-epi	0093	Normal tissue, epithelial cells	Epithelial	Normal	Pre	Nulliparous	Female
GSM4909257	GSM4909257	N-0093-total	0093	Normal tissue, total cells	Total	Normal	Pre	Nulliparous	Female
GSM4909258	GSM4909258	N-1469-epi	1469	Normal tissue, epithelial cells	Epithelial	Normal	Pre	Nulliparous	Female
GSM4909259	GSM4909259	N-0408-epi	0408	Normal tissue, epithelial cells	Epithelial	Normal	Pre	Nulliparous	Female
GSM4909260	GSM4909260	N-1105-epi	1105	Normal tissue, epithelial cells	Epithelial	Normal	Pre	Nulliparous	Female
GSM4909261	GSM4909261	N-0230.17-total	230.17	Normal tissue, total cells	Total	Normal	Pre	Nulliparous	Female
GSM4909262	GSM4909262	N-0064-epi	0064	Normal tissue, epithelial cells	Epithelial	Normal	Pre	Nulliparous	Female
GSM4909263	GSM4909263	N-0064-total	0064	Normal tissue, total cells	Total	Normal	Pre	Nulliparous	Female
GSM4909264	GSM4909264	N-0230.16-epi	230.16	Normal tissue, epithelial cells	Epithelial	Normal	Pre	Parous	Female
GSM4909265	GSM4909265	N-0233-total	0233	Normal tissue, total cells	Total	Normal	Pre	Parous	Female
GSM4909266	GSM4909266	N-0169-total	0169	Normal tissue, total cells	Total	Normal	Pre	Parous	Female
GSM4909267	GSM4909267	N-0123-epi	0023	Normal tissue, epithelial cells	Epithelial	Normal	Pre	Parous	Female
GSM4909268	GSM4909268	N-0123-total	0023	Normal tissue, total cells	Total	Normal	Pre	Parous	Female
GSM4909269	GSM4909269	N-0342-epi	0342	Normal tissue, epithelial cells	Epithelial	Normal	Post	Nulliparous	Female
GSM4909270	GSM4909270	N-0342-total	0342	Normal tissue, total cells	Total	Normal	Post	Nulliparous	Female
GSM4909271	GSM4909271	N-0288-total	0288	Normal tissue, total cells	Total	Normal	Post	Nulliparous	Female
GSM4909272	GSM4909272	N-0021-total	0021	Normal tissue, total cells	Total	Normal	Post	Parous	Female
GSM4909273	GSM4909273	N-0275-epi	0275	Normal tissue, epithelial cells	Epithelial	Normal	Post	Parous	Female
GSM4909274	GSM4909274	N-0275-total	0275	Normal tissue, total cells	Total	Normal	Post	Parous	Female
GSM4909275	GSM4909275	N-0372-epi	0372	Normal tissue, epithelial cells	Epithelial	Normal	Post	Parous	Female
GSM4909276	GSM4909276	N-0372-total	0372	Normal tissue, total cells	Total	Normal	Post	Parous	Female
GSM4909277	GSM4909277	B1-0894	0894	Normal BRCA1+/- pre-neoplastic, total cells	Total	Normal BRCA1+/- pre-neoplastic	NA	Nulliparous	Female
GSM4909278	GSM4909278	B1-0033	0033	Normal BRCA1+/- pre-neoplastic, total cells	Total	Normal BRCA1+/- pre-neoplastic	NA	Nulliparous	Female
GSM4909279	GSM4909279	B1-0023	0023	Normal BRCA1+/- pre-neoplastic, total cells	Total	Normal BRCA1+/- pre-neoplastic	NA	Parous	Female
GSM4909280	GSM4909280	B1-0090	0090	Normal BRCA1+/- pre-neoplastic, total cells	Total	Normal BRCA1+/- pre-neoplastic	NA	Parous	Female
GSM4909281	GSM4909281	TN-0126	0126	Triple negative tumor, total cells	Total	Triple negative tumor	NA	NA	Female
GSM4909282	GSM4909282	TN-0135	0135	Triple negative tumor, total cells	Total	Triple negative tumor	NA	NA	Female
GSM4909283	GSM4909283	TN-0106	0106	Triple negative tumor, total cells	Total	Triple negative tumor	NA	NA	Female
GSM4909284	GSM4909284	TN-0114-T2	0114	Triple negative tumor, total cells	Total	Triple negative tumor	NA	NA	Female
GSM4909285	GSM4909285	TN-B1-4031	4031	Triple negative tumor (BRCA1), total cells	Total	Triple negative (BRCA1) tumor	NA	NA	Female
GSM4909286	GSM4909286	TN-B1-0131	0131	Triple negative tumor (BRCA1), total cells	Total	Triple negative (BRCA1) tumor	NA	NA	Female
GSM4909287	GSM4909287	TN-B1-0554	0554	Triple negative tumor (BRCA1), total cells	Total	Triple negative (BRCA1) tumor	NA	NA	Female
GSM4909288	GSM4909288	TN-B1-0177	0177	Triple negative tumor (BRCA1), total cells	Total	Triple negative (BRCA1) tumor	NA	NA	Female
GSM4909289	GSM4909289	HER2-0308	0308	HER2+ tumor, total cells	Total	HER2+ tumor	NA	NA	Female
GSM4909290	GSM4909290	HER2-0337	0337	HER2+ tumor, total cells	Total	HER2+ tumor	NA	NA	Female
GSM4909291	GSM4909291	HER2-0031	0031	HER2+ tumor, total cells	Total	HER2+ tumor	NA	NA	Female
GSM4909292	GSM4909292	HER2-0069	0069	HER2+ tumor, total cells	Total	HER2+ tumor	NA	NA	Female
GSM4909293	GSM4909293	HER2-0161	0161	HER2+ tumor, total cells	Total	HER2+ tumor	NA	NA	Female
GSM4909294	GSM4909294	HER2-0176	0176	HER2+ tumor, total cells	Total	HER2+ tumor	NA	NA	Female
GSM4909295	GSM4909295	ER-0319	0319	ER+ tumor, total cells	Total	ER+ tumor	NA	NA	Female
GSM4909296	GSM4909296	ER-0001	0001	ER+ tumor, total cells	Total	ER+ tumor	NA	NA	Female
GSM4909297	GSM4909297	ER-0125	0125	ER+ tumor, total cells	Total	ER+ tumor	NA	NA	Female
GSM4909298	GSM4909298	ER-0360	0360	ER+ tumor, total cells	Total	ER+ tumor	NA	NA	Female
GSM4909299	GSM4909299	ER-0114-T3	0114	ER+ tumor, total cells	Total	ER+ tumor	NA	NA	Female
GSM4909300	GSM4909300	ER-0032	0032	ER+ tumor, total cells	Total	ER+ tumor	NA	NA	Female
GSM4909301	GSM4909301	ER-0042	0042	ER+ tumor, total cells	Total	ER+ tumor	NA	NA	Female
GSM4909302	GSM4909302	ER-0025	0025	ER+ tumor, total cells	Total	ER+ tumor	NA	NA	Female
GSM4909303	GSM4909303	ER-0151	0151	ER+ tumor, total cells	Total	ER+ tumor	NA	NA	Female
GSM4909304	GSM4909304	ER-0163	0163	ER+ tumor, total cells	Total	ER+ tumor	NA	NA	Female
GSM4909305	GSM4909305	ER-0029-7C	0029	ER+ tumor, total cells	Total	ER+ tumor	NA	NA	Female
GSM4909306	GSM4909306	ER-0029-9C	0029	ER+ tumor, total cells	Total	ER+ tumor	NA	NA	Female
GSM4909307	GSM4909307	ER-0040-T	0040	ER+ tumor, total cells	Total	ER+ tumor	NA	NA	Female
GSM4909308	GSM4909308	ER-0040-LN	0040	Lymph node, total cells	Total	Involved LN	NA	NA	Female
GSM4909309	GSM4909309	ER-0043-T	0043	ER+ tumor, total cells	Total	ER+ tumor	NA	NA	Female
GSM4909310	GSM4909310	ER-0043-LN	0043	Lymph node, total cells	Lymph node	Involved LN	NA	NA	Female
GSM4909311	GSM4909311	ER-0056-T	0056	ER+ tumor, total cells	Total	ER+ tumor	NA	NA	Female
GSM4909312	GSM4909312	ER-0056-LN	0056	Lymph node, total cells	Lymph node	Involved LN	NA	NA	Female
GSM4909313	GSM4909313	ER-0064-T	0064	ER+ tumor, total cells	Total	ER+ tumor	NA	NA	Female
GSM4909314	GSM4909314	ER-0064-LN	0064	Lymph node, total cells	Lymph node	Involved LN	NA	NA	Female
GSM4909315	GSM4909315	ER-0167-T	0167	ER+ tumor, total cells	Total	ER+ tumor	NA	NA	Female
GSM4909316	GSM4909316	ER-0167-LN	0167	Lymph node, total cells	Lymph node	Involved LN	NA	NA	Female
GSM4909317	GSM4909317	ER-0173-T	0173	ER+ tumor, total cells	Total	ER+ tumor	NA	NA	Female
GSM4909318	GSM4909318	ER-0173-LN	0173	Lymph node, total cells	Lymph node	Involved LN	NA	NA	Female
GSM4909319	GSM4909319	mER-0178	0178	ER+ tumor, total cells	Total	ER+ tumor	NA	NA	Male
GSM4909320	GSM4909320	mER-0068-T	0068	ER+ tumor, total cells	Total	ER+ tumor	NA	NA	Male
GSM4909321	GSM4909321	mER-0068-LN	0068	Lymph node, total cells	Lymph node	Involved LN	NA	NA	Male

## Sheet: Table S2
Table S2: Risk table for TCGA-BRCA cohort (Overall Survival).
ID	time	status	riskscore	risk
TCGA-D8-A1XO-01A-11R-A14M-07	8.06666666666667	0	0.487669690099733	High
TCGA-AN-A0FN-01A-11R-A034-07	7.26666666666667	0	-0.391896	Low
TCGA-AC-A62X-01A-11R-A29R-07	1.13333333333333	0	0.76340601380594	High
TCGA-E2-A14U-01A-11R-A22K-07	27.9333333333333	0	-1.27904	Low
TCGA-E9-A1R3-01A-31R-A14M-07	2.13333333333333	0	0.147365627833996	High
TCGA-BH-A18M-01A-11R-A12D-07	73.5666666666667	1	0.650109116204544	High
TCGA-E2-A15T-01A-11R-A115-07	8.9	0	1.17579278023075	High
TCGA-AR-A0TU-01A-31R-A109-07	12	0	-0.70599	Low
TCGA-EW-A1IX-01A-12R-A144-07	36.0666666666667	0	-0.286107	Low
TCGA-B6-A408-01A-12R-A24H-07	50.6333333333333	0	-0.20148	Low
TCGA-E2-A1IE-01A-11R-A13Q-07	32.7666666666667	0	0.568608017104659	High
TCGA-E2-A10E-01A-21R-A10J-07	13.9333333333333	0	0.420469941465115	High
TCGA-EW-A3U0-01A-11R-A22K-07	7.63333333333333	0	-0.813651	Low
TCGA-BH-A0H5-01A-21R-A115-07	36	0	-1.3155	Low
TCGA-E2-A14W-01A-11R-A12D-07	27.8	0	1.54754494638291	High
TCGA-AQ-A04L-01B-21R-A10J-07	111.966666666667	0	-0.838641	Low
TCGA-BH-A1FD-01A-11R-A13Q-07	33.6333333333333	1	1.75841642250416	High
TCGA-AR-A0TR-01A-11R-A084-07	5.33333333333333	1	0.811491869901149	High
TCGA-A7-A0CE-01A-11R-A00Z-07	8.46666666666667	0	0.889282599911179	High
TCGA-AO-A0J8-01A-21R-A034-07	9.23333333333333	0	0.00369314831890639	Low
TCGA-BH-A1F0-01A-11R-A137-07	26.1666666666667	1	0.142603942293604	High
TCGA-A2-A0SU-01A-11R-A084-07	45.0666666666667	0	-0.177541	Low
TCGA-AC-A2FF-01A-11R-A17B-07	56.2	0	0.0416859982187877	Low
TCGA-E2-A15S-01A-11R-A115-07	9.13333333333333	0	0.323656426409473	High
TCGA-E2-A14N-01A-31R-A137-07	45	0	0.438275219815937	High
TCGA-D8-A3Z6-01A-11R-A239-07	6.16666666666667	0	0.258272715369145	High
TCGA-A8-A06U-01A-11R-A00Z-07	29.4333333333333	1	0.85650811490184	High
TCGA-A7-A13E-01B-06R-A277-07	9.56666666666667	0	0.805430485982041	High
TCGA-UL-AAZ6-01A-11R-A41B-07	14.2	0	0.318816033725413	High
TCGA-B6-A0I9-01A-11R-A034-07	12.0666666666667	1	1.16837939021615	High
TCGA-A8-A099-01A-11R-A00Z-07	10.1333333333333	0	1.07483999081254	High
TCGA-OL-A5RY-01A-21R-A28M-07	14.3	0	-0.98285	Low
TCGA-D8-A1XV-01A-11R-A14M-07	4.9	0	0.598799264929599	High
TCGA-BH-A18T-01A-11R-A12D-07	7.46666666666667	1	0.96057281569226	High
TCGA-B6-A0RT-01A-21R-A084-07	90.7	0	-0.345989	Low
TCGA-A1-A0SJ-01A-11R-A084-07	13.8666666666667	0	-0.806924	Low
TCGA-E9-A247-01A-11R-A169-07	0.433333333333333	0	0.108131890827545	Low
TCGA-A8-A09X-01A-11R-A00Z-07	14.2	1	0.987011327106058	High
TCGA-BH-A1FC-01A-11R-A13Q-07	115.733333333333	1	0.568528439760387	High
TCGA-A8-A082-01A-11R-A00Z-07	18.3	0	0.908864168443852	High
TCGA-A7-A13E-01A-11R-A12P-07	9.56666666666667	0	1.34167084201169	High
TCGA-BH-A1EV-01A-11R-A137-07	12.1666666666667	1	0.398690983764418	High
TCGA-C8-A135-01A-11R-A115-07	0.433333333333333	0	0.440686387600481	High
TCGA-WT-AB44-01A-11R-A41B-07	26.3666666666667	0	-1.68228	Low
TCGA-A7-A3J0-01A-11R-A213-07	2.53333333333333	0	0.718712858916209	High
TCGA-B6-A0IJ-01A-11R-A034-07	179.433333333333	0	-0.0464664	Low
TCGA-LL-A441-01A-11R-A24H-07	3.03333333333333	0	-0.532112	Low
TCGA-A2-A3XT-01A-11R-A22U-07	74.6	0	-0.125833	Low
TCGA-D8-A27I-01A-11R-A16F-07	6.2	0	0.539194079571308	High
TCGA-A2-A1G6-01A-11R-A13Q-07	4.4	0	-0.424579	Low
TCGA-BH-A0GY-01A-11R-A056-07	30.5666666666667	0	0.911698330904494	High
TCGA-E2-A1B0-01A-11R-A12P-07	42.3666666666667	0	0.722543738584139	High
TCGA-E9-A1RH-01A-21R-A169-07	0.466666666666667	0	0.656034801165535	High
TCGA-A1-A0SB-01A-11R-A144-07	8.63333333333333	0	0.0588715288573269	Low
TCGA-A7-A0DC-01A-11R-A00Z-07	9.1	0	0.554304269401177	High
TCGA-A7-A3IZ-01A-11R-A213-07	4.93333333333333	0	-0.461094	Low
TCGA-LL-A5YL-01A-12R-A29R-07	5.63333333333333	0	-0.675942	Low
TCGA-BH-A0DI-01A-21R-A12P-07	22.4333333333333	0	-0.154686	Low
TCGA-E2-A1B1-01A-21R-A12P-07	45.3666666666667	0	0.311019278580641	High
TCGA-BH-A0H3-01A-11R-A12P-07	38.3	0	-0.570964	Low
TCGA-D8-A27K-01A-11R-A16F-07	3.96666666666667	0	0.011033595997707	Low
TCGA-A2-A04U-01A-11R-A115-07	22.3666666666667	0	0.424223444823612	High
TCGA-AO-A0J6-01A-11R-A034-07	25.8333333333333	0	1.27048020636659	High
TCGA-BH-A0E2-01A-11R-A056-07	12.5333333333333	0	0.515347700607081	High
TCGA-E2-A1L8-01A-11R-A13Q-07	33.8333333333333	0	-0.557676	Low
TCGA-OL-A5RZ-01A-11R-A28M-07	10.4333333333333	0	0.450477685279878	High
TCGA-B6-A1KF-01A-11R-A13Q-07	102.933333333333	0	0.956754498245066	High
TCGA-E2-A1L7-01A-11R-A144-07	21.1	0	0.329287367895419	High
TCGA-B6-A0I6-01A-11R-A034-07	33.0333333333333	1	-0.0948543	Low
TCGA-AN-A0XL-01A-11R-A10J-07	0.333333333333333	0	0.228775502388848	High
TCGA-A8-A08B-01A-11R-A00Z-07	23.4	0	0.475307959706655	High
TCGA-AC-A6IX-06A-11R-A32P-07	0.433333333333333	0	0.138131318469295	High
TCGA-E2-A2P6-01A-11R-A19W-07	5.6	0	-0.443786	Low
TCGA-E2-A3DX-01A-21R-A213-07	7.23333333333333	0	-0.898996	Low
TCGA-E2-A159-01A-11R-A115-07	17.1666666666667	0	1.64073636236915	High
TCGA-A8-A0A1-01A-11R-A00Z-07	12.1666666666667	0	0.257411037187193	High
TCGA-D8-A4Z1-01A-21R-A266-07	7.43333333333333	0	0.0132391471106074	Low
TCGA-AR-A1AS-01A-11R-A12P-07	38.3333333333333	0	0.910792646705355	High
TCGA-AR-A24P-01A-11R-A169-07	0.866666666666667	0	-0.0565008	Low
TCGA-BH-A0HL-01A-11R-A10U-07	2.4	0	0.896413221505376	High
TCGA-A8-A08X-01A-21R-A00Z-07	34.4666666666667	0	0.38394578873737	High
TCGA-A8-A09V-01A-11R-A034-07	15.2333333333333	0	0.208268810969266	High
TCGA-D8-A1XT-01A-11R-A14M-07	6.43333333333333	0	0.617342621324475	High
TCGA-GM-A4E0-01A-12R-A266-07	58.4333333333333	0	-2.21978	Low
TCGA-AN-A0XN-01A-21R-A109-07	0.333333333333333	0	-0.622929	Low
TCGA-A2-A04V-01A-21R-A034-07	64	1	-0.734013	Low
TCGA-A7-A26I-01B-06R-A22O-07	4.06666666666667	0	-0.0021106	Low
TCGA-A2-A3XS-01A-11R-A22U-07	34.4	1	0.545636159824353	High
TCGA-BH-A0BP-01A-11R-A115-07	49.3666666666667	0	0.096444803323555	Low
TCGA-AC-A3QQ-01B-06R-A22O-07	1.13333333333333	0	-0.124989	Low
TCGA-AO-A12C-01A-11R-A10J-07	66.4666666666667	0	0.239020352601859	High
TCGA-E2-A1IH-01A-11R-A13Q-07	21.9333333333333	0	-0.130717	Low
TCGA-BH-A0DS-01A-11R-A056-07	2.6	0	-0.20033	Low
TCGA-AN-A0FS-01A-11R-A034-07	6.36666666666667	0	-0.141614	Low
TCGA-E2-A15F-01A-11R-A115-07	15.6333333333333	0	0.967993563140977	High
TCGA-BH-A0H7-01A-13R-A056-07	23.4	0	0.451889982369245	High
TCGA-A8-A079-01A-21R-A00Z-07	9.13333333333333	0	0.0929988903036117	Low
TCGA-D8-A1XY-01A-11R-A14M-07	2.7	0	1.48678101176114	High
TCGA-AO-A0JD-01A-11R-A056-07	60.4333333333333	0	1.89772723025749	High
TCGA-B6-A0WZ-01A-11R-A109-07	131.366666666667	0	-0.202425	Low
TCGA-D8-A1XB-01A-11R-A14D-07	6.7	0	0.535048593139503	High
TCGA-BH-A0BS-01A-11R-A12P-07	54.7	0	1.25429823151399	High
TCGA-BH-A1EX-01A-11R-A13Q-07	50.2666666666667	1	0.423642497817159	High
TCGA-D8-A1X8-01A-11R-A14M-07	9.06666666666667	0	0.555217768569969	High
TCGA-HN-A2OB-01A-21R-A27Q-07	61.6333333333333	0	-1.02235	Low
TCGA-B6-A0I1-01A-11R-A21T-07	78.7	1	0.714374991860058	High
TCGA-OL-A97C-01A-32R-A41B-07	6.5	0	-1.49931	Low
TCGA-E2-A1LK-01A-21R-A14D-07	8.86666666666667	1	0.286987612561192	High
TCGA-D8-A1J8-01A-11R-A13Q-07	8.53333333333333	0	1.11380990460073	High
TCGA-A8-A06P-01A-11R-A00Z-07	13.2	0	0.113364757076396	Low
TCGA-D8-A3Z5-01A-41R-A24H-07	14.7	0	-1.04498	Low
TCGA-E2-A152-01A-11R-A12D-07	19.6	0	0.57712556991799	High
TCGA-BH-A0DT-01A-21R-A12D-07	39	0	-1.00824	Low
TCGA-A1-A0SQ-01A-21R-A144-07	18.4666666666667	0	0.63151201182613	High
TCGA-BH-A1FE-01A-11R-A13Q-07	75.7666666666667	1	0.564347855014236	High
TCGA-BH-A0BR-01A-21R-A115-07	54.4333333333333	0	0.8314482904745	High
TCGA-BH-A18V-01A-11R-A12D-07	51.8666666666667	1	1.43117365529687	High
TCGA-GM-A3XN-01A-12R-A22U-07	54.7	0	-1.33104	Low
TCGA-A8-A09B-01A-11R-A00Z-07	12.1666666666667	0	0.676171353793181	High
TCGA-PL-A8LY-01A-11R-A41B-07	0.266666666666667	0	-0.874602	Low
TCGA-E2-A10A-01A-21R-A115-07	11.7333333333333	0	1.21633563656244	High
TCGA-A7-A6VV-01A-22R-A33J-07	6.03333333333333	0	0.582543553333182	High
TCGA-BH-A0BW-01A-11R-A115-07	11.8333333333333	0	0.395044309541249	High
TCGA-AN-A04A-01A-21R-A034-07	3	0	0.782812930304257	High
TCGA-OL-A66P-01A-11R-A31O-07	1.93333333333333	0	-0.651035	Low
TCGA-A2-A0SV-01A-11R-A084-07	27.5	1	0.464657517656281	High
TCGA-E2-A1LG-01A-21R-A14M-07	11.6666666666667	0	-0.636588	Low
TCGA-E2-A1LL-01A-11R-A144-07	33.8	0	3.26180940836201	High
TCGA-A2-A0ET-01A-31R-A034-07	26.9	0	0.621920126199603	High
TCGA-B6-A0RI-01A-11R-A056-07	226.533333333333	0	0.266047090512874	High
TCGA-BH-A0GZ-01A-11R-A056-07	10.9333333333333	0	0.254676225040956	High
TCGA-A2-A25A-01A-12R-A16F-07	98.9333333333333	0	-1.18032	Low
TCGA-EW-A1J5-01A-11R-A13Q-07	7.56666666666667	0	-0.442963	Low
TCGA-D8-A27V-01A-12R-A17B-07	2.43333333333333	0	1.09662843932608	High
TCGA-A2-A0ST-01A-12R-A084-07	87.3	0	-0.626446	Low
TCGA-A2-A0CT-01A-31R-A056-07	63.9333333333333	0	-0.131628	Low
TCGA-AR-A0TT-01A-31R-A084-07	57.6666666666667	0	0.426952450315383	High
TCGA-LL-A8F5-01A-11R-A36F-07	6.3	0	0.813584978459496	High
TCGA-AN-A0FW-01A-11R-A034-07	0.366666666666667	0	0.505195066004126	High
TCGA-BH-A18U-01A-21R-A12D-07	52.1	1	1.00399470649621	High
TCGA-E9-A248-01A-11R-A169-07	0.733333333333333	0	1.9382859848291	High
TCGA-A2-A0CU-01A-12R-A034-07	5.26666666666667	1	0.986948698898962	High
TCGA-BH-A0HY-01A-11R-A056-07	28.9333333333333	0	0.202411321072265	High
TCGA-D8-A1XG-01A-11R-A14D-07	2.5	0	0.541836270820839	High
TCGA-BH-A204-01A-11R-A157-07	84.4666666666667	1	1.03377201734828	High
TCGA-AR-A0U4-01A-11R-A109-07	56.1333333333333	0	-4.7595	Low
TCGA-E2-A14S-01A-11R-A12D-07	27.8	0	0.720923880216147	High
TCGA-D8-A1JS-01A-11R-A13Q-07	3.5	0	0.612232135944527	High
TCGA-C8-A1HK-01A-21R-A13Q-07	0.233333333333333	0	1.93282970637497	High
TCGA-AR-A250-01A-31R-A169-07	56.9333333333333	0	0.357887735850335	High
TCGA-EW-A1PB-01A-11R-A144-07	20.2666666666667	0	0.751073998915191	High
TCGA-AC-A2B8-01A-11R-A17B-07	1.5	0	-0.00769181	Low
TCGA-A8-A08I-01A-11R-A00Z-07	12.1666666666667	0	-0.587107	Low
TCGA-BH-A18V-06A-11R-A213-07	51.8666666666667	1	0.360876583132113	High
TCGA-LL-A6FQ-01A-11R-A31O-07	2.66666666666667	0	-1.15024	Low
TCGA-A1-A0SP-01A-11R-A084-07	19.4666666666667	0	0.516930552819915	High
TCGA-LL-A442-01A-11R-A24H-07	3.63333333333333	0	0.471116108503765	High
TCGA-A2-A3XU-01A-12R-A22U-07	30.4	1	0.882651453577822	High
TCGA-A2-A25B-01A-11R-A169-07	8.6	0	-0.190834	Low
TCGA-AO-A1KT-01A-11R-A13Q-07	18.0333333333333	0	-0.0315639	Low
TCGA-B6-A1KN-01A-11R-A13Q-07	111	0	0.667439855874607	High
TCGA-LL-A5YP-01A-21R-A28M-07	3.3	0	-0.285274	Low
TCGA-AR-A1AU-01A-11R-A12P-07	46.9666666666667	0	-1.28322	Low
TCGA-A7-A26J-01A-11R-A169-07	2.26666666666667	0	0.48876135117971	High
TCGA-E9-A245-01A-22R-A16F-07	0.866666666666667	0	0.596035956433981	High
TCGA-BH-A42T-01A-11R-A24H-07	1	0	-0.368958	Low
TCGA-A2-A0EM-01A-11R-A034-07	91.9333333333333	0	0.0932426903671457	Low
TCGA-PE-A5DC-01A-12R-A27Q-07	47.6666666666667	1	-0.477988	Low
TCGA-A7-A13D-01A-13R-A277-07	8.9	0	0.370641097554738	High
TCGA-BH-A0HK-01A-11R-A056-07	5.93333333333333	0	0.0259339863584491	Low
TCGA-B6-A0IP-01A-11R-A034-07	112.466666666667	0	-0.388587	Low
TCGA-D8-A1XA-01A-11R-A14D-07	9.13333333333333	0	0.409971574266601	High
TCGA-D8-A1X5-01A-11R-A14D-07	5.7	0	1.1291141389827	High
TCGA-D8-A27L-01A-11R-A16F-07	4.2	0	0.292450446203552	High
TCGA-D8-A1JJ-01A-31R-A14M-07	9.13333333333333	0	1.87237560829576	High
TCGA-A2-A1G1-01A-21R-A13Q-07	12.3666666666667	0	1.66566376674612	High
TCGA-E2-A1IL-01A-11R-A14D-07	0.466666666666667	0	0.292600078380436	High
TCGA-A7-A4SB-01A-21R-A266-07	6.66666666666667	0	-0.156771	Low
TCGA-A7-A13H-01A-11R-A22K-07	18.3666666666667	0	-1.02658	Low
TCGA-BH-A0AY-01A-21R-A00Z-07	25.9	0	-0.224554	Low
TCGA-A8-A075-01A-11R-A084-07	17.2666666666667	0	0.347738440450991	High
TCGA-E2-A158-01A-11R-A12D-07	15	0	0.201662359860904	High
TCGA-BH-A0B4-01A-11R-A00Z-07	39.7	0	-0.223891	Low
TCGA-BH-A0DV-01A-21R-A12P-07	45.8	0	-0.897219	Low
TCGA-A2-A0EP-01A-52R-A22U-07	100.7	0	-0.958947	Low
TCGA-EW-A1PE-01A-11R-A144-07	3.56666666666667	0	0.0752487866702302	Low
TCGA-LL-A73Z-01A-11R-A32P-07	4.56666666666667	0	0.196864229944792	High
TCGA-AR-A1AJ-01A-21R-A12P-07	53.5	0	-0.114886	Low
TCGA-E9-A227-01A-11R-A157-07	0.8	0	0.172965504472644	High
TCGA-AO-A0JB-01A-11R-A32Y-07	38.3333333333333	0	-1.15418	Low
TCGA-A8-A09N-01A-11R-A00Z-07	1.03333333333333	0	0.755643841755106	High
TCGA-E2-A15A-01A-11R-A12D-07	16.7333333333333	0	1.30190620345427	High
TCGA-A8-A08A-01A-11R-A32Y-07	1	0	-0.0245379	Low
TCGA-AC-A5XS-01A-11R-A29R-07	1.56666666666667	0	-0.540017	Low
TCGA-BH-A209-01A-11R-A157-07	131.966666666667	1	0.949920170280823	High
TCGA-AR-A24S-01A-11R-A169-07	62.9333333333333	0	-0.458209	Low
TCGA-A7-A26E-01A-11R-A169-07	14.0333333333333	0	0.823399074363997	High
TCGA-EW-A1P6-01A-11R-A144-07	10.4	0	1.15946545100322	High
TCGA-C8-A1HM-01A-12R-A137-07	0.2	0	0.859466684553643	High
TCGA-OL-A6VQ-01A-12R-A41B-07	7.63333333333333	0	-1.25729	Low
TCGA-E2-A1B5-01A-21R-A12P-07	25.8	0	0.219384813889315	High
TCGA-A2-A0CV-01A-31R-A115-07	62.3333333333333	0	-0.833557	Low
TCGA-5L-AAT1-01A-12R-A41B-07	49.0333333333333	0	-1.11652	Low
TCGA-B6-A0X4-01A-11R-A109-07	28.6666666666667	1	0.769667546161705	High
TCGA-E2-A105-01A-11R-A10J-07	38.7666666666667	0	0.978903423954693	High
TCGA-AC-A3HN-01A-11R-A213-07	0.7	0	-0.0507682	Low
TCGA-A1-A0SO-01A-22R-A084-07	28.4	0	-0.102805	Low
TCGA-E2-A10B-01A-11R-A10J-07	24.9333333333333	0	0.603624893022527	High
TCGA-A1-A0SH-01A-11R-A084-07	47.9	0	0.203269593655824	High
TCGA-E9-A2JS-01A-11R-A180-07	0.433333333333333	0	0.893102019262234	High
TCGA-A2-A04R-01A-41R-A109-07	78.8333333333333	0	0.462561991456556	High
TCGA-C8-A12Q-01A-11R-A115-07	0.0666666666666667	0	0.866011438683203	High
TCGA-AN-A0FT-01A-11R-A034-07	6.1	0	-0.549094	Low
TCGA-4H-AAAK-01A-12R-A41B-07	5.26666666666667	0	-0.685027	Low
TCGA-E2-A15M-01A-11R-A12D-07	7.83333333333333	0	0.950785656679261	High
TCGA-C8-A273-01A-11R-A16F-07	0.2	0	0.382210447486507	High
TCGA-BH-A0DE-01A-11R-A115-07	31.6	0	-0.0277528	Low
TCGA-A2-A0EO-01A-11R-A034-07	72.7	0	-2.51642	Low
TCGA-AC-A6IW-01A-12R-A33J-07	0.7	0	0.689478122498098	High
TCGA-LL-A50Y-01A-11R-A266-07	7	0	-0.526014	Low
TCGA-A7-A0DA-01A-31R-A115-07	12.4333333333333	0	-0.296102	Low
TCGA-GM-A2DL-01A-11R-A18M-07	92.1	0	0.15541806217536	High
TCGA-E9-A244-01A-11R-A169-07	0.7	0	1.11814	High
TCGA-E2-A15C-01A-31R-A12D-07	16.5666666666667	0	0.399475321323317	High
TCGA-BH-A0BT-01A-11R-A12P-07	46.2	0	-2.78632	Low
TCGA-BH-A0E9-01B-11R-A115-07	46.8333333333333	0	-0.949718	Low
TCGA-BH-A18I-01A-11R-A12D-07	7.33333333333333	0	-0.0628659	Low
TCGA-BH-A0HI-01A-11R-A084-07	20.6666666666667	0	0.473873366294639	High
TCGA-A2-A0CZ-01A-11R-A034-07	44.6333333333333	0	-0.931251	Low
TCGA-D8-A1X9-01A-12R-A157-07	12.6666666666667	0	0.820902197012576	High
TCGA-BH-A18R-01A-11R-A12D-07	38.0666666666667	1	0.48266276715261	High
TCGA-AO-A12B-01A-11R-A10J-07	78.6333333333333	0	0.931055258230718	High
TCGA-BH-A0B3-01A-11R-A056-07	40.1	0	0.641945465926469	High
TCGA-C8-A8HP-01A-11R-A36F-07	0.266666666666667	0	0.445019654021415	High
TCGA-AR-A1AM-01A-41R-A22K-07	63.4333333333333	0	-0.172199	Low
TCGA-A2-A4S0-01A-21R-A266-07	9.03333333333333	0	0.481562067924606	High
TCGA-AO-A126-01A-11R-A10J-07	95	0	-1.90473	Low
TCGA-AR-A5QN-01A-12R-A28M-07	13.2	0	0.00246628154392445	Low
TCGA-A8-A08F-01A-11R-A00Z-07	18.3	0	0.0139901582954842	Low
TCGA-PE-A5DE-01A-11R-A27Q-07	61.8333333333333	0	-1.13631	Low
TCGA-A8-A076-01A-21R-A00Z-07	54.7333333333333	0	0.739191214757743	High
TCGA-A2-A3XZ-01A-42R-A239-07	32.4333333333333	0	0.101235443720605	Low
TCGA-AR-A256-01A-11R-A169-07	95.1333333333333	1	0.828164905836537	High
TCGA-BH-A0DG-01A-21R-A12P-07	23.7666666666667	0	0.0261905564049716	Low
TCGA-C8-A26Z-01A-11R-A16F-07	0.133333333333333	0	1.15784304027169	High
TCGA-BH-A0HW-01A-11R-A034-07	52.0333333333333	0	0.553060910194451	High
TCGA-A1-A0SD-01A-11R-A115-07	14.5666666666667	0	0.195153022422999	High
TCGA-A2-A0CX-01A-21R-A00Z-07	43.4333333333333	0	-0.320544	Low
TCGA-AO-A03R-01A-21R-A034-07	56.9	0	-0.247152	Low
TCGA-PL-A8LZ-01A-31R-A36F-07	4	0	-0.0220993	Low
TCGA-A7-A26F-01A-21R-A169-07	8.56666666666667	0	-0.0679527	Low
TCGA-BH-A1F8-01A-11R-A13Q-07	0.0333333333333333	1	2.78545816236537	High
TCGA-BH-A0BZ-01A-31R-A12P-07	49.7333333333333	0	0.0237824976985351	Low
TCGA-AC-A8OP-01A-11R-A36F-07	1.76666666666667	0	0.195090087202712	High
TCGA-GI-A2C9-01A-11R-A21T-07	23.7	0	0.84170446155521	High
TCGA-AO-A125-01A-11R-A10J-07	100.633333333333	0	-0.715048	Low
TCGA-EW-A1OZ-01A-11R-A144-07	31.3666666666667	0	-1.30033	Low
TCGA-A7-A26I-01A-11R-A169-07	4.06666666666667	0	0.910983199835188	High
TCGA-A7-A0DC-01B-04R-A22O-07	9.1	0	0.0630955605416042	Low
TCGA-BH-A0C0-01A-21R-A056-07	42.3333333333333	0	-0.381529	Low
TCGA-AN-A03Y-01A-21R-A00Z-07	0.333333333333333	0	0.695481065291251	High
TCGA-D8-A145-01A-11R-A115-07	1.63333333333333	0	0.319609676091443	High
TCGA-OL-A66I-01A-21R-A29R-07	23.8	0	-1.48363	Low
TCGA-OL-A5S0-01A-11R-A28M-07	9.93333333333333	0	-1.60025	Low
TCGA-B6-A0I5-01A-11R-A034-07	151.666666666667	0	-1.53811	Low
TCGA-Z7-A8R6-01A-11R-A41B-07	93.3333333333333	0	-0.0960087	Low
TCGA-LD-A9QF-01A-32R-A41B-07	8.86666666666667	0	-0.747284	Low
TCGA-C8-A134-01A-11R-A115-07	0.466666666666667	0	0.727502034046227	High
TCGA-AN-A0XT-01A-11R-A109-07	0.333333333333333	0	-0.460065	Low
TCGA-BH-A0HA-01A-11R-A12P-07	28.5333333333333	0	-0.289005	Low
TCGA-AR-A251-01A-12R-A169-07	45.8	0	2.71145074734099	High
TCGA-C8-A26V-01A-11R-A16F-07	0.3	0	0.928074147367404	High
TCGA-OL-A5D7-01A-11R-A27Q-07	47.2	0	-0.550185	Low
TCGA-E2-A1IU-01A-11R-A14D-07	4.23333333333333	0	0.149469811487445	High
TCGA-AN-A0XO-01A-11R-A109-07	12.5	0	0.439359963904271	High
TCGA-AN-A0AR-01A-11R-A00Z-07	0.333333333333333	0	-0.156246	Low
TCGA-E2-A1IO-01A-11R-A144-07	16.6	0	0.096188218763266	Low
TCGA-D8-A27H-01A-11R-A16F-07	0.633333333333333	0	0.28502880645509	High
TCGA-A7-A56D-01A-11R-A27Q-07	5.9	0	-1.35092	Low
TCGA-GM-A3XL-01A-11R-A22U-07	57.2333333333333	0	0.225994534789411	High
TCGA-BH-A0DX-01A-11R-A115-07	48.0666666666667	0	0.533618115262801	High
TCGA-A2-A4RX-01A-11R-A266-07	9.13333333333333	0	0.558206606318155	High
TCGA-B6-A0X1-01A-11R-A109-07	189.233333333333	0	1.23761250667576	High
TCGA-S3-AA0Z-01A-11R-A41B-07	10.7333333333333	0	0.695291506016935	High
TCGA-BH-A1FH-01A-12R-A13Q-07	34.4666666666667	1	0.244739040145194	High
TCGA-AR-A24W-01A-11R-A169-07	51.6666666666667	0	0.252719203301299	High
TCGA-A8-A06T-01A-11R-A00Z-07	41.6333333333333	0	2.44539092793121	High
TCGA-B6-A0RM-01A-11R-A084-07	79.1	1	0.554307893310927	High
TCGA-A2-A04N-01A-11R-A115-07	105.1	0	0.320297738818205	High
TCGA-E9-A226-01A-21R-A157-07	0.533333333333333	0	0.310317944389005	High
TCGA-BH-A0BJ-01A-11R-A056-07	22	0	0.322372150103335	High
TCGA-E2-A10C-01A-21R-A10J-07	28.4666666666667	0	-0.993238	Low
TCGA-BH-A5IZ-01A-11R-A27Q-07	3.26666666666667	0	-0.205069	Low
TCGA-E9-A1RD-01A-11R-A157-07	0.666666666666667	0	1.41344538431845	High
TCGA-AC-A5XU-01A-11R-A28M-07	0.3	0	0.573664438176828	High
TCGA-E2-A576-01A-11R-A31O-07	19.2666666666667	0	-0.829659	Low
TCGA-E9-A295-01A-11R-A16F-07	0.733333333333333	0	0.0887854706978589	Low
TCGA-LD-A74U-01A-13R-A33J-07	6.76666666666667	0	-0.287453	Low
TCGA-E2-A570-01A-11R-A29R-07	18.3	0	-0.905744	Low
TCGA-E9-A1R4-01A-21R-A14D-07	0.966666666666667	0	0.253380383035329	High
TCGA-B6-A409-01A-11R-A24H-07	19.1	1	0.808994340398926	High
TCGA-EW-A423-01A-11R-A24H-07	10.3	0	-0.257538	Low
TCGA-OL-A6VO-01A-12R-A33J-07	16	0	-0.342336	Low
TCGA-EW-A6SD-01A-12R-A33J-07	33.6666666666667	0	0.165151833660306	High
TCGA-GM-A2DH-01A-11R-A180-07	42.8666666666667	0	0.140581319026545	High
TCGA-LL-A5YM-01A-11R-A28M-07	4.76666666666667	0	0.0790357182185859	Low
TCGA-BH-A0H6-01A-21R-A056-07	24.9	0	0.515973799011503	High
TCGA-AR-A24Z-01A-11R-A169-07	52.4666666666667	0	1.2482030364965	High
TCGA-A7-A4SD-01A-11R-A266-07	5.6	0	-0.0246469	Low
TCGA-A7-A13E-01A-11R-A277-07	9.56666666666667	0	1.15369956039033	High
TCGA-AR-A0U0-01A-11R-A109-07	0.266666666666667	0	2.99305020451694	High
TCGA-BH-A203-01A-12R-A169-07	39.1333333333333	1	1.79135177659941	High
TCGA-E2-A1IK-01A-11R-A144-07	17.3	0	-0.0265021	Low
TCGA-D8-A13Y-01A-11R-A115-07	8.8	0	1.87092942815963	High
TCGA-AR-A1AX-01A-11R-A12P-07	36.7666666666667	0	0.613144692730242	High
TCGA-C8-A1HN-01A-11R-A137-07	0.0666666666666667	0	0.319368145383324	High
TCGA-A2-A0YC-01A-11R-A109-07	21.4666666666667	0	0.1742879451445	High
TCGA-A2-A0CL-01A-11R-A115-07	60.9	0	-0.0135771	Low
TCGA-D8-A1JA-01A-11R-A13Q-07	0.6	0	1.40837140856381	High
TCGA-D8-A1XM-01A-21R-A14M-07	7.26666666666667	0	0.711561860007715	High
TCGA-A2-A04X-01A-21R-A034-07	44.9666666666667	0	-0.017351	Low
TCGA-AO-A12A-01A-21R-A115-07	91.8333333333333	0	-0.103171	Low
TCGA-E2-A1BC-01A-11R-A12P-07	9.9	0	0.765404964031733	High
TCGA-A2-A25F-01A-11R-A169-07	3.8	0	-0.127494	Low
TCGA-EW-A2FV-01A-11R-A17B-07	7.96666666666667	0	-0.230667	Low
TCGA-C8-A132-01A-31R-A115-07	0.433333333333333	0	0.567634199811584	High
TCGA-AN-A0AT-01A-11R-A034-07	0.333333333333333	0	0.732650039633934	High
TCGA-AC-A3QP-01A-11R-A22U-07	9.53333333333333	0	-1.51986	Low
TCGA-E9-A1R6-01A-11R-A14D-07	2.8	0	1.37557274912895	High
TCGA-C8-A27B-01A-11R-A169-07	1	0	-0.0659607	Low
TCGA-E2-A14P-01A-31R-A12D-07	16.2333333333333	0	-0.482	Low
TCGA-LL-A7SZ-01A-32R-A352-07	5.66666666666667	0	-0.616685	Low
TCGA-BH-A0BO-01A-23R-A12D-07	36.1666666666667	0	-1.99913	Low
TCGA-BH-A0HX-01A-21R-A056-07	27.6333333333333	0	-1.30319	Low
TCGA-A1-A0SF-01A-11R-A144-07	48.7666666666667	0	-1.20244	Low
TCGA-BH-A0B9-01A-11R-A056-07	52.4	0	-0.362845	Low
TCGA-D8-A1JG-01B-11R-A13Q-07	6.23333333333333	0	1.48955669302181	High
TCGA-D8-A1JN-01A-11R-A13Q-07	7.23333333333333	0	0.105329356195934	Low
TCGA-A8-A06Z-01A-11R-A00Z-07	1.03333333333333	0	1.27439925945898	High
TCGA-A2-A0YD-01A-11R-A109-07	18.3333333333333	0	-0.329087	Low
TCGA-D8-A1JB-01A-11R-A13Q-07	12.1666666666667	0	-0.0747381	Low
TCGA-JL-A3YX-01A-11R-A22U-07	11.7333333333333	0	0.0506839951085121	Low
TCGA-A1-A0SK-01A-12R-A084-07	32.2333333333333	1	0.510201126921485	High
TCGA-A7-A13D-01A-13R-A12P-07	8.9	0	0.29669229229593	High
TCGA-AO-A03P-01A-11R-A00Z-07	85.8666666666667	0	0.372936774569238	High
TCGA-E2-A1LA-01A-11R-A144-07	15.4333333333333	0	-0.65918	Low
TCGA-AN-A0FJ-01A-11R-A00Z-07	8.06666666666667	0	-0.0934143	Low
TCGA-LL-A7T0-01A-31R-A352-07	3.26666666666667	0	0.591092847464625	High
TCGA-D8-A141-01A-11R-A115-07	3.76666666666667	0	-0.125398	Low
TCGA-BH-A0HB-01A-11R-A056-07	26.8666666666667	0	1.02906052507457	High
TCGA-C8-A12Z-01A-11R-A115-07	0.4	0	0.942616362146335	High
TCGA-A8-A08S-01A-11R-A034-07	19.3333333333333	0	0.443914096899744	High
TCGA-S3-AA10-01A-21R-A41B-07	8.03333333333333	0	0.117419648360729	Low
TCGA-E2-A2P5-01A-11R-A19W-07	10.8666666666667	0	-0.199395	Low
TCGA-AO-A0J9-01A-11R-A034-07	41.8666666666667	0	-0.775568	Low
TCGA-AR-A1AK-01A-21R-A12P-07	51.9666666666667	0	-0.16311	Low
TCGA-C8-A27A-01A-11R-A169-07	12.3666666666667	0	1.1403612765848	High
TCGA-A2-A0T2-01A-11R-A084-07	8.5	1	0.954929710914191	High
TCGA-BH-A0C3-01A-21R-A12P-07	48.8	0	-0.311935	Low
TCGA-E2-A1IG-01A-11R-A144-07	25.1666666666667	0	-0.0597695	Low
TCGA-C8-A1HL-01A-11R-A137-07	0.0666666666666667	0	0.452815219769003	High
TCGA-BH-A208-01A-11R-A157-07	58.6333333333333	1	-0.0365554	Low
TCGA-A2-A3KD-01A-12R-A213-07	26.8	0	0.0522231405209304	Low
TCGA-A2-A0YK-01A-22R-A109-07	11.1333333333333	0	-0.289901	Low
TCGA-BH-A1FR-01A-11R-A13Q-07	54.7333333333333	1	0.654740094368056	High
TCGA-BH-A18J-01A-11R-A12D-07	20.4	1	-0.0968232	Low
TCGA-B6-A0WY-01A-11R-A109-07	115.366666666667	1	-0.122048	Low
TCGA-AR-A24M-01A-11R-A169-07	66.3666666666667	0	0.425232848001251	High
TCGA-A8-A093-01A-11R-A00Z-07	18.2	0	0.0792264775176287	Low
TCGA-AC-A6NO-01A-12R-A33J-07	1.7	0	-0.0778208	Low
TCGA-A8-A09M-01A-11R-A00Z-07	15.2333333333333	0	0.485123802138322	High
TCGA-EW-A1OV-01A-11R-A144-07	17.4333333333333	0	-0.784171	Low
TCGA-C8-A278-01A-11R-A169-07	0.3	0	0.828671274539035	High
TCGA-AR-A1AP-01A-11R-A12P-07	40.5333333333333	0	0.321660345334828	High
TCGA-E2-A1LS-01A-12R-A157-07	7.96666666666667	0	0.772002719271897	High
TCGA-A8-A09R-01A-11R-A00Z-07	9.1	0	0.588857827715423	High
TCGA-GM-A5PX-01A-12R-A28M-07	18.3666666666667	0	-1.86908	Low
TCGA-E2-A1BD-01A-11R-A12P-07	10.5666666666667	0	-0.401635	Low
TCGA-E9-A1R2-01A-11R-A14D-07	0.633333333333333	0	0.93593246434245	High
TCGA-AC-A62Y-01A-11R-A29R-07	1.83333333333333	0	-0.845149	Low
TCGA-AC-A2FO-01A-11R-A180-07	51.4	0	-0.680444	Low
TCGA-AR-A1AY-01A-21R-A12P-07	20.5	0	0.817860043025434	High
TCGA-AR-A2LN-01A-21R-A18M-07	17.3333333333333	0	-2.50315	Low
TCGA-D8-A27W-01A-11R-A16F-07	0.5	0	0.975835917336738	High
TCGA-OL-A66O-01A-11R-A31O-07	7.33333333333333	0	-0.605272	Low
TCGA-BH-A0HU-01A-11R-A034-07	13.0666666666667	0	0.0965027796365633	Low
TCGA-AR-A1AH-01A-11R-A12D-07	76.6	0	0.262809463204201	High
TCGA-C8-A8HQ-01A-11R-A36F-07	0.3	0	-0.191726	Low
TCGA-A2-A04Y-01A-21R-A034-07	25.4666666666667	0	0.064750736281891	Low
TCGA-GM-A2DB-01A-31R-A18M-07	53.8666666666667	0	-0.734146	Low
TCGA-E9-A3Q9-01A-11R-A21T-07	1.03333333333333	0	0.375809465468882	High
TCGA-A8-A09I-01A-22R-A034-07	33.5333333333333	0	1.53502416341046	High
TCGA-A8-A07L-01A-11R-A00Z-07	17.2666666666667	0	1.23887022353933	High
TCGA-A2-A3XV-01A-21R-A239-07	14.2666666666667	0	-1.39107	Low
TCGA-AR-A0TY-01A-12R-A115-07	56.6333333333333	1	1.60426388935539	High
TCGA-LL-A6FR-01A-12R-A31O-07	3.93333333333333	0	0.111901663836084	Low
TCGA-A2-A0CW-01A-21R-A115-07	58.3333333333333	0	0.503898829281122	High
TCGA-E2-A14O-01A-31R-A115-07	39.1	0	-1.00535	Low
TCGA-D8-A1J9-01A-11R-A13Q-07	8.26666666666667	0	0.920896372096268	High
TCGA-A2-A0CQ-01A-21R-A034-07	79.7666666666667	0	-1.77044	Low
TCGA-A8-A08Z-01A-21R-A00Z-07	40.5666666666667	0	0.39308668408061	High
TCGA-AC-A2FE-01A-11R-A19W-07	26.3666666666667	0	0.210294399403687	High
TCGA-AO-A03N-01B-11R-A10J-07	54.8333333333333	0	-0.77479	Low
TCGA-EW-A2FW-01A-11R-A17B-07	6.36666666666667	0	0.491281761181906	High
TCGA-AR-A2LL-01A-11R-A180-07	7.46666666666667	0	0.568910997410723	High
TCGA-AR-A24Q-01A-12R-A169-07	66.9666666666667	0	0.966762079458229	High
TCGA-AO-A0J3-01A-11R-A034-07	10.0666666666667	0	0.277468771315382	High
TCGA-AR-A2LK-01A-11R-A180-07	43.4666666666667	0	0.703391781218788	High
TCGA-A8-A08J-01A-11R-A00Z-07	37.5666666666667	1	0.869820513286915	High
TCGA-A2-A0YF-01A-21R-A109-07	9.63333333333333	0	0.635450399888879	High
TCGA-BH-A0AZ-01A-21R-A12P-07	28.9	0	0.0459605754312845	Low
TCGA-AC-A3W5-01A-11R-A22K-07	1.83333333333333	0	-0.0736973	Low
TCGA-BH-A0C1-01B-11R-A12D-07	44.6333333333333	0	-0.305568	Low
TCGA-AN-A0XU-01A-11R-A109-07	0.333333333333333	0	1.40704640592279	High
TCGA-B6-A0RQ-01A-11R-A115-07	142.233333333333	1	-0.601941	Low
TCGA-D8-A1JL-01A-11R-A13Q-07	8.83333333333333	0	0.589088136019716	High
TCGA-D8-A1Y0-01A-11R-A14M-07	5.56666666666667	0	0.158467530544513	High
TCGA-A8-A07I-01A-11R-A00Z-07	14.2	0	0.706438692147742	High
TCGA-OL-A5RU-01A-11R-A28M-07	28.0333333333333	0	-0.261818	Low
TCGA-AR-A5QP-01A-11R-A28M-07	14.6333333333333	0	-0.354559	Low
TCGA-D8-A1XZ-01A-11R-A14M-07	4.03333333333333	0	1.37416404247393	High
TCGA-EW-A1PC-01B-11R-A21T-07	6.23333333333333	0	-0.381023	Low
TCGA-AO-A0J2-01A-11R-A034-07	19.5	0	-0.415969	Low
TCGA-E2-A1LB-01A-11R-A144-07	32.4	0	1.00915084727542	High
TCGA-5T-A9QA-01A-11R-A41B-07	0.4	0	0.83781615772258	High
TCGA-B6-A40C-01A-11R-A239-07	55.7666666666667	0	-0.459106	Low
TCGA-A7-A0CH-01A-21R-A00Z-07	5.4	0	0.526496537896533	High
TCGA-A2-A0D2-01A-21R-A034-07	25.3666666666667	0	-0.420226	Low
TCGA-BH-A1FE-06A-11R-A213-07	75.7666666666667	1	-0.561181	Low
TCGA-AC-A8OR-01A-21R-A41B-07	1.33333333333333	0	0.0366526687366565	Low
TCGA-S3-A6ZH-01A-22R-A32P-07	8.76666666666667	0	0.388166674125687	High
TCGA-E2-A14Z-01A-11R-A115-07	17.2666666666667	0	-0.539508	Low
TCGA-E2-A1IF-01A-11R-A144-07	31.8666666666667	0	-0.662934	Low
TCGA-D8-A27G-01A-11R-A16F-07	7	0	0.697605607749916	High
TCGA-EW-A1PH-01A-11R-A14M-07	4.66666666666667	0	0.517422694467754	High
TCGA-E2-A14Y-01A-21R-A12D-07	22.9333333333333	0	1.60007189784987	High
TCGA-WT-AB41-01A-11R-A41B-07	51.6666666666667	0	-2.18007	Low
TCGA-AO-A1KQ-01A-11R-A13Q-07	50.6333333333333	0	-0.0288788	Low
TCGA-D8-A1JU-01A-11R-A13Q-07	3.53333333333333	0	0.291818135972598	High
TCGA-BH-A0DL-01A-11R-A115-07	48.9	0	-0.182078	Low
TCGA-E2-A56Z-01A-12R-A29R-07	7.3	0	-0.0289124	Low
TCGA-A7-A0D9-01A-31R-A056-07	5.33333333333333	0	0.390281522824911	High
TCGA-BH-A0DO-01B-11R-A12D-07	17.5	0	-0.821164	Low
TCGA-A2-A259-01A-11R-A16F-07	42.8666666666667	0	0.411422448320074	High
TCGA-AN-A0XP-01A-11R-A109-07	0.3	0	0.469796830910739	High
TCGA-BH-A202-01A-11R-A14M-07	0.733333333333333	0	1.13246874699512	High
TCGA-A2-A0YJ-01A-11R-A109-07	10.8666666666667	0	1.28453646573235	High
TCGA-B6-A0RH-01A-21R-A115-07	191.633333333333	0	0.181121217400817	High
TCGA-D8-A1XD-01A-11R-A14D-07	5.16666666666667	0	0.728034251204848	High
TCGA-A2-A0T7-01A-21R-A084-07	13.2333333333333	0	-0.484256	Low
TCGA-AC-A2FG-01A-11R-A17B-07	37.5	0	0.300112443865652	High
TCGA-BH-AB28-01A-31R-A41B-07	6.16666666666667	0	-1.33772	Low
TCGA-B6-A0RE-01A-11R-A056-07	214.5	0	0.343249018181379	High
TCGA-D8-A1JP-01A-11R-A13Q-07	5.56666666666667	0	0.191848352131402	High
TCGA-S3-A6ZF-01A-32R-A32P-07	7.06666666666667	0	0.0636288943956067	Low
TCGA-AC-A3YJ-01A-11R-A22U-07	1.33333333333333	0	-0.15696	Low
TCGA-A2-A0YI-01A-31R-A10J-07	11.9333333333333	0	0.36975518387307	High
TCGA-AN-A04C-01A-21R-A034-07	1.8	0	0.556298516870461	High
TCGA-B6-A0RO-01A-22R-A084-07	164.3	0	0.0942854036541133	Low
TCGA-A2-A0SX-01A-12R-A084-07	42.9333333333333	0	0.26973370889187	High
TCGA-E2-A14R-01A-11R-A115-07	28.1666666666667	0	0.768296816756193	High
TCGA-A7-A0DB-01A-11R-A277-07	4.7	0	-0.199176	Low
TCGA-EW-A1OX-01A-11R-A144-07	18.7333333333333	0	0.970850932140813	High
TCGA-A7-A26F-01B-04R-A22O-07	8.56666666666667	0	-1.07846	Low
TCGA-AC-A2QH-01B-04R-A22O-07	1.03333333333333	0	1.27976895982849	High
TCGA-AO-A1KR-01A-12R-A144-07	71.3666666666667	0	-1.29175	Low
TCGA-BH-A1ES-01A-11R-A137-07	115.4	1	0.689200639406164	High
TCGA-B6-A0IE-01A-11R-A034-07	66.4333333333333	1	0.147019160751507	High
TCGA-EW-A1P5-01A-11R-A144-07	12.1666666666667	0	1.47594976951421	High
TCGA-E9-A5UO-01A-11R-A28M-07	0.233333333333333	0	1.5677310057651	High
TCGA-HN-A2NL-01A-11R-A18M-07	2.63333333333333	0	0.316851670052443	High
TCGA-GM-A2DN-01A-11R-A180-07	78.4	0	-1.09534	Low
TCGA-EW-A1J2-01A-21R-A13Q-07	4.66666666666667	0	-0.43748	Low
TCGA-AR-A1AR-01A-31R-A137-07	17.4666666666667	1	0.634475500932325	High
TCGA-D8-A1JF-01A-11R-A13Q-07	3.2	0	0.805577382172245	High
TCGA-AC-A23E-01A-11R-A157-07	2.4	0	0.184135529736218	High
TCGA-BH-A0DH-01A-11R-A084-07	38.5333333333333	0	0.497645107309594	High
TCGA-BH-A0BG-01A-11R-A115-07	25.2	0	0.214899145994265	High
TCGA-D8-A1JD-01A-11R-A13Q-07	9.1	0	0.396860054252262	High
TCGA-E9-A3HO-01A-11R-A213-07	0.633333333333333	0	-0.070068	Low
TCGA-A2-A0EV-01A-11R-A034-07	18.1666666666667	0	0.618364233460135	High
TCGA-BH-A0EI-01A-11R-A115-07	24.7666666666667	0	-0.265649	Low
TCGA-AN-A0XW-01A-11R-A109-07	5.66666666666667	0	0.400685746439322	High
TCGA-A8-A09A-01A-11R-A00Z-07	10.1333333333333	0	0.658628385688838	High
TCGA-A1-A0SG-01A-11R-A144-07	14.4666666666667	0	-0.0152395	Low
TCGA-BH-A1F6-01A-11R-A13Q-07	98.8333333333333	1	0.866671657374236	High
TCGA-E9-A249-01A-11R-A169-07	0.966666666666667	0	-0.62923	Low
TCGA-BH-A1F2-01A-31R-A13Q-07	31.9666666666667	1	0.612608777511718	High
TCGA-AR-A1AI-01A-11R-A12P-07	62.7	0	0.902395845287252	High
TCGA-AC-A3BB-01A-21R-A19W-07	1	0	-0.477817	Low
TCGA-BH-A0WA-01A-11R-A109-07	12.4	0	0.420684011421141	High
TCGA-AQ-A1H3-01A-31R-A13Q-07	5.4	0	-0.52843	Low
TCGA-BH-A0E7-01A-11R-A034-07	45.4333333333333	0	1.14512357732952	High
TCGA-BH-A0RX-01A-21R-A084-07	5.66666666666667	0	-0.27517	Low
TCGA-AO-A03U-01B-21R-A10J-07	59.7666666666667	1	0.132604500977365	High
TCGA-AR-A24L-01A-11R-A169-07	74.0333333333333	0	1.25080540919411	High
TCGA-E2-A1IJ-01A-11R-A144-07	24.1666666666667	0	-0.46515	Low
TCGA-E2-A150-01A-11R-A12D-07	19.7	0	1.0318632971377	High
TCGA-E2-A15H-01A-11R-A12D-07	1.4	0	-0.233512	Low
TCGA-BH-A0E0-01A-11R-A056-07	4.46666666666667	0	0.411181223385177	High
TCGA-A2-A0D1-01A-11R-A034-07	26.2	0	0.658137656597858	High
TCGA-A8-A09D-01A-11R-A00Z-07	13.2	0	0.528563435158279	High
TCGA-AQ-A1H2-01A-11R-A13Q-07	7.66666666666667	0	0.379291754404966	High
TCGA-D8-A1JH-01A-11R-A13Q-07	9.46666666666667	0	0.561886778723827	High
TCGA-GM-A3NW-01A-21R-A22K-07	99.4	0	-0.265861	Low
TCGA-A7-A0CD-01A-11R-A00Z-07	5.7	0	0.533770722188668	High
TCGA-A7-A2KD-01A-31R-A21T-07	6.06666666666667	0	0.0808431109622238	Low
TCGA-AO-A03L-01A-41R-A056-07	81.4	0	0.409188462744017	High
TCGA-AR-A2LR-01A-12R-A18M-07	20.6666666666667	0	0.0844685750712109	Low
TCGA-E2-A14T-01A-11R-A115-07	29.6666666666667	0	1.11564985062712	High
TCGA-AR-A24U-01A-11R-A169-07	54.1	0	0.980245693865889	High
TCGA-BH-A28Q-01A-11R-A16F-07	6.53333333333333	0	-0.416135	Low
TCGA-C8-A3M7-01A-12R-A21T-07	0.0333333333333333	0	-0.996418	Low
TCGA-BH-A0EE-01A-11R-A034-07	31.4333333333333	0	-0.276388	Low
TCGA-3C-AALK-01A-11R-A41B-07	40.5666666666667	0	-0.212722	Low
TCGA-EW-A1OW-01A-21R-A144-07	15.4666666666667	0	0.597925675665487	High
TCGA-E2-A108-01A-13R-A10J-07	4.13333333333333	0	-0.344945	Low
TCGA-A2-A0D4-01A-11R-A00Z-07	16.5333333333333	0	1.07148477292503	High
TCGA-E9-A1RA-01A-11R-A14D-07	0.966666666666667	0	-0.0921475	Low
TCGA-V7-A7HQ-01A-11R-A33J-07	53	0	-0.549349	Low
TCGA-AR-A24X-01A-11R-A169-07	48.8333333333333	0	0.589948351144235	High
TCGA-D8-A73X-01A-11R-A32P-07	12.2666666666667	0	-0.103946	Low
TCGA-BH-A0W4-01A-11R-A109-07	5.83333333333333	0	0.216040745174501	High
TCGA-BH-A1ET-01A-11R-A137-07	84	1	0.711143352605381	High
TCGA-BH-A0C7-01B-11R-A115-07	43.5	0	0.492624017806912	High
TCGA-LD-A7W5-01A-22R-A352-07	4.13333333333333	0	-0.728216	Low
TCGA-D8-A1XK-01A-21R-A14M-07	10.8666666666667	0	1.56761215570637	High
TCGA-A2-A0T4-01A-31R-A084-07	13.1666666666667	0	-0.102383	Low
TCGA-AN-A0FX-01A-11R-A034-07	0.333333333333333	0	0.418277487948261	High
TCGA-A2-A0D3-01A-11R-A115-07	24.5333333333333	0	-0.439117	Low
TCGA-D8-A1XS-01A-11R-A14M-07	1.66666666666667	0	0.586101008337331	High
TCGA-C8-A138-01A-11R-A115-07	0.233333333333333	0	-0.826726	Low
TCGA-AR-A24R-01A-11R-A169-07	58.2	0	0.350134309170856	High
TCGA-BH-A2L8-01A-11R-A18M-07	5.6	0	-0.0487169	Low
TCGA-AC-A3OD-01A-11R-A21T-07	1.16666666666667	0	-0.12945	Low
TCGA-E2-A14V-01A-11R-A12D-07	24.9333333333333	0	0.582650828960991	High
TCGA-AO-A0JE-01A-11R-A056-07	65.5333333333333	0	0.280270084972293	High
TCGA-A8-A06O-01A-11R-A00Z-07	13.2	0	1.34717985958905	High
TCGA-AO-A0J4-01A-11R-A034-07	9.8	0	0.619454532545436	High
TCGA-EW-A1P3-01A-11R-A144-07	32.9	0	-3.31072	Low
TCGA-B6-A0WT-01A-11R-A109-07	179.866666666667	0	0.460270472075715	High
TCGA-C8-A26W-01A-11R-A16F-07	0.233333333333333	0	-0.0195826	Low
TCGA-AN-A041-01A-11R-A034-07	0.233333333333333	0	-0.55342	Low
TCGA-D8-A1Y3-01A-11R-A157-07	4.16666666666667	0	0.0859194926153825	Low
TCGA-B6-A40B-01A-11R-A239-07	84.0333333333333	0	-1.12314	Low
TCGA-B6-A1KI-01A-11R-A14M-07	48.7666666666667	0	0.511614640932308	High
TCGA-BH-A0B6-01A-11R-A19W-07	57.7333333333333	0	-0.603919	Low
TCGA-A8-A09W-01A-11R-A00Z-07	1	0	0.750109078797271	High
TCGA-AO-A03M-01B-11R-A10J-07	48.5	0	0.210896614147133	High
TCGA-E2-A1L6-01A-11R-A13Q-07	43.7333333333333	0	-0.107458	Low
TCGA-AR-A0TQ-01A-11R-A084-07	50	0	-0.196531	Low
TCGA-B6-A0RP-01A-21R-A084-07	104.2	1	-0.457942	Low
TCGA-AN-A0FK-01A-11R-A034-07	7.1	0	0.36062592529199	High
TCGA-BH-A18L-01A-32R-A12D-07	27.0333333333333	1	1.19219351898758	High
TCGA-E9-A1RG-01A-11R-A14D-07	1.16666666666667	0	-1.29169	Low
TCGA-D8-A146-01A-31R-A115-07	11.4666666666667	0	0.174466131442239	High
TCGA-AO-A0JL-01A-11R-A056-07	43.9666666666667	0	-1.41588	Low
TCGA-EW-A6SB-01A-12R-A32P-07	25.3333333333333	0	-0.470017	Low
TCGA-3C-AAAU-01A-11R-A41B-07	125.566666666667	0	0.664383684581031	High
TCGA-GM-A2DF-01A-11R-A180-07	43.3	0	0.0155612087093663	Low
TCGA-E2-A15J-01A-11R-A12P-07	15.4666666666667	0	-0.836701	Low
TCGA-EW-A424-01A-11R-A24H-07	10.7333333333333	0	-0.328553	Low
TCGA-A8-A07Z-01A-11R-A00Z-07	28.4333333333333	0	0.0793020415535313	Low
TCGA-BH-A0BF-01A-21R-A12P-07	26.0666666666667	0	-0.0268224	Low
TCGA-E2-A154-01A-11R-A115-07	10.8333333333333	0	0.569181184235161	High
TCGA-A8-A08T-01A-21R-A00Z-07	94.3333333333333	0	-0.114255	Low
TCGA-A8-A085-01A-11R-A00Z-07	37.4666666666667	0	1.00043151258783	High
TCGA-EW-A1P4-01A-21R-A144-07	16.7	0	0.924652700579522	High
TCGA-EW-A1J1-01A-11R-A13Q-07	9.4	0	0.649599313466901	High
TCGA-A8-A084-01A-21R-A00Z-07	15.2666666666667	0	0.300037452575351	High
TCGA-E9-A1R7-01A-11R-A14M-07	1.13333333333333	0	1.93534151492607	High
TCGA-AO-A0JA-01A-11R-A056-07	11.5333333333333	0	0.885000966998506	High
TCGA-A2-A1G4-01A-11R-A13Q-07	12.4	0	0.719160748783287	High
TCGA-A2-A0CK-01A-11R-A22K-07	127.333333333333	0	-1.31091	Low
TCGA-A7-A4SE-01A-11R-A266-07	12.3666666666667	0	-0.231228	Low
TCGA-C8-A274-01A-11R-A16F-07	0.0333333333333333	0	0.736164103777992	High
TCGA-BH-A0B0-01A-21R-A115-07	47.6	0	-0.243336	Low
TCGA-BH-A1EY-01A-11R-A13Q-07	17.9333333333333	1	1.04325170994702	High
TCGA-BH-A42U-01A-12R-A24H-07	110.8	0	-2.22963	Low
TCGA-A7-A26E-01A-11R-A277-07	14.0333333333333	0	0.364971111576501	High
TCGA-AQ-A04H-01B-11R-A10J-07	14.6333333333333	0	0.404015720857485	High
TCGA-A7-A425-01A-11R-A24H-07	9.76666666666667	0	-0.912384	Low
TCGA-AN-A049-01A-21R-A00Z-07	0.633333333333333	0	0.696167788698735	High
TCGA-A8-A06Y-01A-21R-A00Z-07	26.3666666666667	0	0.013082600816421	Low
TCGA-AR-A2LE-01A-11R-A180-07	130.433333333333	0	0.372242067263691	High
TCGA-AC-A23G-01A-11R-A213-07	11	0	-0.995458	Low
TCGA-A7-A5ZV-01A-11R-A28M-07	7	0	0.238436905755384	High
TCGA-BH-A0BL-01A-11R-A115-07	44.6666666666667	0	0.0133986359204938	Low
TCGA-EW-A1PA-01A-11R-A144-07	8.9	0	0.164502918911624	High
TCGA-E9-A1RC-01A-11R-A157-07	40.8	0	0.773791985865811	High
TCGA-A2-A1FV-01A-11R-A13Q-07	15.3666666666667	0	0.0744854615888459	Low
TCGA-BH-A0AU-01A-11R-A12P-07	24.8666666666667	0	0.733701413868141	High
TCGA-LL-A73Y-01A-11R-A33J-07	4.2	0	-1.46261	Low
TCGA-D8-A1JC-01A-11R-A13Q-07	5.93333333333333	0	0.956020495325303	High
TCGA-E2-A1B4-01A-11R-A12P-07	30.3666666666667	0	-0.600192	Low
TCGA-A2-A0EW-01A-21R-A115-07	25.6666666666667	0	-0.375957	Low
TCGA-AR-A1AL-01A-21R-A12P-07	49.5	0	-0.0450984	Low
TCGA-LD-A7W6-01A-81R-A352-07	4.66666666666667	0	-0.991601	Low
TCGA-JL-A3YW-01A-12R-A239-07	12	0	0.263724296324442	High
TCGA-A2-A1FX-01A-11R-A13Q-07	31.1666666666667	0	0.425002684934835	High
TCGA-BH-A1FJ-01A-11R-A13Q-07	64.2333333333333	1	1.2135053332396	High
TCGA-A2-A0EX-01A-21R-A034-07	18.3333333333333	0	0.154713009800642	High
TCGA-A2-A0CM-01A-31R-A034-07	25.1333333333333	1	1.27105279216093	High
TCGA-GM-A2DA-01A-11R-A18M-07	196.966666666667	0	-0.74977	Low
TCGA-B6-A0X7-01A-11R-A10J-07	59.3666666666667	1	-0.193276	Low
TCGA-AR-A2LQ-01A-22R-A18M-07	17.2	0	-0.570217	Low
TCGA-W8-A86G-01A-21R-A36F-07	5.36666666666667	0	-0.88179	Low
TCGA-BH-A0HO-01A-11R-A034-07	2.53333333333333	0	0.599064140914028	High
TCGA-BH-A1FU-01A-11R-A14D-07	56.2666666666667	1	0.52664364692936	High
TCGA-A8-A091-01A-11R-A00Z-07	19.3333333333333	0	-0.300026	Low
TCGA-AR-A0U2-01A-11R-A109-07	85.0333333333333	1	1.78026546903084	High
TCGA-BH-A0W7-01A-11R-A115-07	18.6	0	-0.780484	Low
TCGA-E9-A1R5-01A-11R-A14M-07	1.4	0	1.17642394665223	High
TCGA-3C-AALI-01A-11R-A41B-07	126.7	0	0.46408303969064	High
TCGA-E9-A1RI-01A-11R-A169-07	1.6	0	0.557143951445177	High
TCGA-A2-A0ER-01A-21R-A034-07	63.4333333333333	0	0.249568058537925	High
TCGA-3C-AALJ-01A-31R-A41B-07	40.9333333333333	0	-0.461339	Low
TCGA-E9-A6HE-01A-11R-A31O-07	3.06666666666667	0	-2.33851	Low
TCGA-A7-A5ZX-01A-12R-A29R-07	4.4	0	-1.13149	Low
TCGA-BH-A201-01A-11R-A14M-07	7	0	0.312933139214333	High
TCGA-A2-A04W-01A-31R-A115-07	63.9333333333333	0	0.405463256922154	High
TCGA-D8-A73W-01A-22R-A352-07	8.13333333333333	0	-0.252582	Low
TCGA-A7-A3IY-01A-21R-A21T-07	5.03333333333333	0	-0.159905	Low
TCGA-OL-A6VR-01A-32R-A33J-07	28.2666666666667	0	-1.24279	Low
TCGA-EW-A2FR-01A-11R-A21T-07	37.3333333333333	0	0.268243028823633	High
TCGA-BH-A0HP-01A-12R-A084-07	13.8	0	-0.801416	Low
TCGA-AR-A0TP-01A-11R-A084-07	84.0333333333333	0	0.281112204862514	High
TCGA-D8-A1XJ-01A-11R-A14M-07	11.7333333333333	0	1.4536352556452	High
TCGA-AR-A0TZ-01A-12R-A084-07	77.2	0	0.119324647314321	Low
TCGA-EW-A1OY-01A-11R-A144-07	19.7666666666667	0	-1.18011	Low
TCGA-GM-A2DC-01A-11R-A18M-07	54.2666666666667	0	0.972579852181802	High
TCGA-BH-A18N-01A-11R-A12D-07	15.6	1	0.66700432270269	High
TCGA-D8-A1XR-01A-11R-A14M-07	5.6	0	0.821522559051184	High
TCGA-A2-A0ES-01A-11R-A115-07	33.3666666666667	0	-1.44685	Low
TCGA-LL-A9Q3-01A-11R-A41B-07	7.46666666666667	0	0.346720869215226	High
TCGA-A7-A3J1-01A-11R-A213-07	2.5	0	-0.440471	Low
TCGA-AC-A5EH-01A-11R-A28M-07	2.1	0	-0.315938	Low
TCGA-E2-A15O-01A-11R-A115-07	9.63333333333333	0	0.949548378253689	High
TCGA-AN-A0FD-01A-11R-A034-07	6.53333333333333	0	0.100390977310062	Low
TCGA-BH-A0BM-01A-11R-A056-07	37.2333333333333	0	-0.348747	Low
TCGA-EW-A1IY-01A-11R-A13Q-07	8.6	0	0.648998378726554	High
TCGA-E9-A3X8-01A-31R-A22U-07	0.766666666666667	0	-2.5527	Low
TCGA-AR-A24K-01A-11R-A169-07	51.6	0	0.512424537589564	High
TCGA-S3-AA11-01A-31R-A41B-07	5.63333333333333	0	0.182007343674049	High
TCGA-EW-A6SA-01A-21R-A32P-07	17	0	0.275681565568794	High
TCGA-A2-A0CP-01A-11R-A034-07	83.1666666666667	0	-0.738853	Low
TCGA-B6-A0RU-01A-11R-A084-07	235.566666666667	0	0.316979502530026	High
TCGA-B6-A0RS-01A-11R-A084-07	102.1	1	0.167994078554843	High
TCGA-A1-A0SN-01A-11R-A144-07	39.8666666666667	0	0.674820695307285	High
TCGA-EW-A1IZ-01A-11R-A13Q-07	8.66666666666667	0	0.344948814373315	High
TCGA-A7-A13F-01A-11R-A12P-07	6.53333333333333	0	0.666635401601944	High
TCGA-D8-A1JT-01A-31R-A13Q-07	4.1	0	0.767683676142967	High
TCGA-D8-A1JM-01A-11R-A13Q-07	7.93333333333333	0	2.0321243097568	High
TCGA-BH-A0BQ-01A-21R-A115-07	27.5666666666667	0	-1.70642	Low
TCGA-BH-A0EA-01A-11R-A115-07	33.0333333333333	1	-0.671211	Low
TCGA-BH-A0BA-01A-11R-A056-07	37.7333333333333	0	-0.267087	Low
TCGA-EW-A6SC-01A-12R-A32P-07	31.7333333333333	0	-2.24264	Low
TCGA-OL-A5DA-01A-11R-A27Q-07	45.2333333333333	0	-0.255533	Low
TCGA-A2-A0T1-01A-21R-A084-07	10.7666666666667	0	-0.0317991	Low
TCGA-AO-A0JC-01A-11R-A056-07	51.5666666666667	0	-1.77172	Low
TCGA-EW-A2FS-01A-11R-A17B-07	39.1	0	-1.65484	Low
TCGA-A8-A09K-01A-11R-A00Z-07	30.4	0	0.928226898226817	High
TCGA-E2-A107-01A-11R-A10J-07	25.4333333333333	0	-0.0429827	Low
TCGA-A7-A6VY-01A-12R-A33J-07	4.16666666666667	0	0.227357601749581	High
TCGA-E2-A14Q-01A-11R-A12D-07	32.4666666666667	0	0.011933189872053	Low
TCGA-E2-A15A-06A-11R-A12D-07	16.7333333333333	0	1.74877344886207	High
TCGA-B6-A0IB-01A-11R-A034-07	131.366666666667	1	-0.688326	Low
TCGA-A8-A06Q-01A-11R-A034-07	1.03333333333333	0	2.42758588743391	High
TCGA-GM-A2DK-01A-21R-A180-07	63.2	0	-0.161384	Low
TCGA-5L-AAT0-01A-12R-A41B-07	49.2333333333333	0	-0.539586	Low
TCGA-A7-A4SC-01A-12R-A266-07	7.16666666666667	0	-0.246789	Low
TCGA-A2-A0CR-01A-11R-A22K-07	98.5	0	-2.57053	Low
TCGA-AC-A2QJ-01A-12R-A19W-07	2.3	0	-2.09103	Low
TCGA-AN-A03X-01A-21R-A00Z-07	0.333333333333333	0	0.124304200478566	High
TCGA-AN-A0FL-01A-11R-A034-07	7.7	0	-0.505698	Low
TCGA-BH-A18P-01A-11R-A12D-07	30.7	1	0.635489500728876	High
TCGA-AC-A3YI-01A-21R-A239-07	1.56666666666667	0	-2.25069	Low
TCGA-A2-A0SY-01A-31R-A084-07	38.4666666666667	0	-0.333442	Low
TCGA-GM-A2DM-01A-11R-A180-07	77.7	0	0.117720579718871	Low
TCGA-D8-A1XF-01A-11R-A14D-07	3.23333333333333	0	0.62289900643491	High
TCGA-BH-A1FM-01A-11R-A13Q-07	46.2666666666667	1	1.24478420088824	High
TCGA-BH-A0HN-01A-11R-A10U-07	17.2	0	-0.328783	Low
TCGA-AN-A0FV-01A-11R-A00Z-07	0.333333333333333	0	0.715702082319312	High
TCGA-B6-A0X0-01A-21R-A115-07	131.5	1	-0.586518	Low
TCGA-AO-A03T-01A-21R-A034-07	39.5666666666667	0	-0.0751471	Low
TCGA-S3-AA15-01A-11R-A41B-07	6.96666666666667	0	-0.805206	Low
TCGA-AO-A12D-01A-11R-A115-07	64.9333333333333	0	0.345462871355846	High
TCGA-A7-A26E-01B-06R-A277-07	14.0333333333333	0	0.575080536817086	High
TCGA-BH-A0DK-01A-21R-A056-07	14.1	0	-0.459487	Low
TCGA-AO-A124-01A-11R-A10J-07	104	0	0.397697062654309	High
TCGA-E2-A15R-01A-11R-A115-07	11	0	1.29487	High
TCGA-D8-A1Y1-01A-21R-A14M-07	3.86666666666667	0	0.105177455372173	Low
TCGA-A2-A04T-01A-21R-A034-07	65	0	0.370300223506242	High
TCGA-UU-A93S-01A-21R-A41B-07	3.86666666666667	1	0.270068436133571	High
TCGA-A2-A0T6-01A-11R-A084-07	11.4666666666667	0	-0.302296	Low
TCGA-E2-A10F-01A-11R-A10J-07	12	0	0.0589181530569753	Low
TCGA-EW-A1IW-01A-11R-A13Q-07	8.4	0	0.618698094451682	High
TCGA-AC-A3TM-01A-11R-A22K-07	3.1	0	-1.54106	Low
TCGA-A7-A0DB-01A-11R-A00Z-07	4.7	0	-0.152038	Low
TCGA-A8-A09C-01A-11R-A00Z-07	1.03333333333333	0	-0.0113476	Low
TCGA-D8-A73U-01A-11R-A33J-07	16.4	0	-0.657864	Low
TCGA-A8-A07E-01A-11R-A034-07	20.2666666666667	0	0.5307385244393	High
TCGA-AC-A3TN-01A-11R-A22K-07	1.13333333333333	0	-0.612793	Low
TCGA-AO-A0JF-01A-11R-A056-07	11.8	0	0.498206575607458	High
TCGA-E2-A153-01A-12R-A12D-07	19.5333333333333	0	-0.451629	Low
TCGA-BH-A0B5-01A-11R-A12P-07	49.0333333333333	0	-0.4322	Low
TCGA-A8-A07W-01A-11R-A00Z-07	10.1333333333333	0	1.0943537183094	High
TCGA-BH-A0B8-01A-21R-A056-07	52.3	0	0.573907215504714	High
TCGA-BH-A0B1-01A-12R-A056-07	38.2666666666667	0	1.31164477246555	High
TCGA-BH-A1FN-01A-11R-A13Q-07	73.0666666666667	1	1.37343883268483	High
TCGA-D8-A147-01A-11R-A115-07	0.0666666666666667	0	0.304158011282135	High
TCGA-PL-A8LX-01A-11R-A41B-07	0.166666666666667	0	0.885368219482965	High
TCGA-E9-A1N4-01A-11R-A14M-07	0.166666666666667	0	-0.440166	Low
TCGA-BH-A18F-01A-11R-A12D-07	8.93333333333333	0	-0.227042	Low
TCGA-D8-A27F-01A-11R-A16F-07	3.53333333333333	0	0.782222761924749	High
TCGA-A8-A0AB-01A-11R-A034-07	17.2666666666667	0	0.774399659655954	High
TCGA-AR-A0TS-01A-11R-A115-07	37.9333333333333	0	0.469526635185326	High
TCGA-BH-A0H9-01A-11R-A056-07	41.5666666666667	0	1.11062974140804	High
TCGA-A8-A07U-01A-11R-A034-07	10.1	0	0.558153787255829	High
TCGA-E2-A14X-01A-11R-A115-07	23.0666666666667	0	1.27349747798577	High
TCGA-C8-A131-01A-11R-A115-07	0.466666666666667	0	-0.274302	Low
TCGA-BH-A1FL-01A-11R-A13Q-07	55.7666666666667	1	0.400734524007807	High
TCGA-C8-A12W-01A-11R-A115-07	0.233333333333333	0	0.503675257151914	High
TCGA-AC-A7VC-01A-11R-A352-07	0.0333333333333333	0	-0.593509	Low
TCGA-AO-A12E-01A-11R-A10J-07	58.1	0	0.502820558220875	High
TCGA-E2-A1LI-01A-12R-A157-07	91.6666666666667	0	-0.227511	Low
TCGA-AC-A2BM-01A-11R-A21T-07	38.7333333333333	0	0.471362076201072	High
TCGA-A8-A07R-01A-21R-A034-07	9.1	0	0.676023441114382	High
TCGA-BH-A0AW-01A-11R-A056-07	20.7333333333333	0	0.332287669681602	High
TCGA-A7-A26J-01B-02R-A277-07	2.26666666666667	0	0.277638185383311	High
TCGA-A7-A426-01A-22R-A24H-07	7.63333333333333	0	-1.87074	Low
TCGA-BH-A6R8-01A-21R-A33J-07	9.76666666666667	0	0.39016529880498	High
TCGA-AC-A8OS-01A-12R-A41B-07	2.33333333333333	0	-0.0280375	Low
TCGA-A2-A04Q-01A-21R-A034-07	72.6333333333333	0	-0.283024	Low
TCGA-A7-A26H-01A-11R-A169-07	2.16666666666667	0	0.80990892581328	High
TCGA-A7-A4SF-01A-11R-A266-07	12.3	0	0.671500367845727	High
TCGA-D8-A27M-01A-11R-A16F-07	4.83333333333333	0	0.237942596937292	High
TCGA-E2-A573-01A-11R-A29R-07	22.5666666666667	0	0.11024183759124	Low
TCGA-A7-A6VW-01A-21R-A33J-07	5.86666666666667	0	-0.054242	Low
TCGA-BH-A0B7-01A-12R-A115-07	57.7666666666667	0	0.476930261281741	High
TCGA-A8-A0A6-01A-12R-A056-07	21.3333333333333	0	-0.0397971	Low
TCGA-AO-A0J5-01A-11R-A034-07	24.5	0	0.496554010187285	High
TCGA-AO-A12H-01A-11R-A115-07	28.7666666666667	0	0.229733456759263	High
TCGA-E2-A15G-01A-11R-A12D-07	10.5333333333333	0	0.49070469784277	High
TCGA-GM-A5PV-01A-11R-A28M-07	13.7333333333333	0	-0.933971	Low
TCGA-E9-A24A-01A-11R-A169-07	0.366666666666667	0	0.63992006216962	High
TCGA-AR-A2LM-01A-11R-A180-07	40.6	0	-0.126431	Low
TCGA-E2-A1II-01A-11R-A144-07	28.3333333333333	0	0.368834203585582	High
TCGA-D8-A27P-01A-11R-A16F-07	0.766666666666667	0	0.722633281975447	High
TCGA-EW-A1J3-01A-11R-A13Q-07	8.4	0	0.500081170800449	High
TCGA-B6-A0I8-01A-11R-A034-07	24.9666666666667	1	0.439341312952442	High
TCGA-AO-A1KS-01A-11R-A13Q-07	0.533333333333333	0	0.758957052714714	High
TCGA-A2-A4S2-01A-12R-A266-07	6.83333333333333	0	0.0892161314494296	Low
TCGA-BH-A6R9-01A-21R-A32P-07	5.33333333333333	0	-0.313309	Low
TCGA-BH-A8FZ-01A-11R-A352-07	4.8	0	-1.15443	Low
TCGA-AC-A2FK-01A-12R-A180-07	39.3333333333333	0	-0.354735	Low
TCGA-A2-A0T0-01A-22R-A084-07	11.2333333333333	0	1.12539214958583	High
TCGA-A8-A07S-01A-11R-A034-07	8.1	0	0.229707168954561	High
TCGA-GM-A2DI-01A-31R-A18M-07	62.7666666666667	0	-0.912127	Low
TCGA-E2-A106-01A-11R-A10J-07	51.8333333333333	0	0.776950542204353	High
TCGA-BH-A0E6-01A-11R-A034-07	9.76666666666667	0	0.116099489955386	Low
TCGA-AO-A03V-01A-11R-A115-07	29.5333333333333	0	0.280466267145068	High
TCGA-AC-A2BK-01A-11R-A21T-07	39.0666666666667	0	0.586082764952704	High
TCGA-AR-A254-01A-21R-A169-07	40.4	0	0.88859371498604	High
TCGA-AO-A129-01A-21R-A10J-07	97.4333333333333	0	-0.740797	Low
TCGA-BH-A8FY-01A-11R-A36F-07	9.83333333333333	1	0.507692216822637	High
TCGA-D8-A143-01A-11R-A115-07	5.73333333333333	0	1.71743880321579	High
TCGA-AC-A3W7-01A-11R-A22K-07	6.4	0	-0.288106	Low
TCGA-A8-A06X-01A-21R-A00Z-07	31.4333333333333	1	1.65122017605719	High
TCGA-AR-A255-01A-11R-A169-07	35.3	0	0.794118672101716	High
TCGA-BH-A0DZ-01A-11R-A00Z-07	16.5	0	0.453372438123925	High
TCGA-AO-A12G-01A-11R-A10J-07	42.2	0	0.156634034651592	High
TCGA-A7-A13D-01B-04R-A277-07	8.9	0	0.733412625358264	High
TCGA-E2-A15L-01A-11R-A12D-07	11.0333333333333	0	0.229445791427193	High
TCGA-AN-A0FF-01A-11R-A034-07	5.73333333333333	0	0.048007784743714	Low
TCGA-A2-A3XX-01A-21R-A239-07	38.9333333333333	0	0.751826144060579	High
TCGA-EW-A1P8-01A-11R-A144-07	7.96666666666667	1	0.534243039525504	High
TCGA-A8-A097-01A-11R-A034-07	12.1666666666667	0	0.524767504485809	High
TCGA-BH-A0E1-01A-11R-A056-07	15.9	0	0.386087614416344	High
TCGA-BH-A0HF-01A-11R-A056-07	24.2333333333333	0	0.0624339942367031	Low
TCGA-E9-A5FL-01A-11R-A27Q-07	0.266666666666667	0	1.59361447060628	High
TCGA-AR-A1AW-01A-21R-A12P-07	35.7333333333333	0	-1.04038	Low
TCGA-AQ-A0Y5-01A-11R-A14M-07	5.73333333333333	1	1.3838605783398	High
TCGA-OK-A5Q2-01A-11R-A27Q-07	2.13333333333333	0	-0.911989	Low
TCGA-E2-A1B6-01A-31R-A12P-07	11.2666666666667	0	-0.986565	Low
TCGA-A8-A07P-01A-11R-A00Z-07	11.1333333333333	0	0.317900112802324	High
TCGA-AR-A0TW-01A-11R-A084-07	24.6333333333333	0	1.04517949824512	High
TCGA-BH-A1EU-01A-11R-A137-07	42.8666666666667	1	0.0633981395747314	Low
TCGA-A2-A0EQ-01A-11R-A034-07	68.4333333333333	0	-0.558454	Low
TCGA-A8-A08C-01A-11R-A00Z-07	20.2666666666667	0	0.465113070022627	High
TCGA-OL-A5RW-01A-11R-A28M-07	26.5666666666667	0	0.265164845479666	High
TCGA-B6-A0WS-01A-11R-A115-07	98.8333333333333	1	0.398697954771344	High
TCGA-BH-A42V-01A-11R-A24H-07	9.06666666666667	0	-1.20467	Low
TCGA-A2-A0YL-01A-21R-A109-07	8.93333333333333	0	-1.039	Low
TCGA-B6-A402-01A-11R-A239-07	55.0333333333333	0	0.111724755948103	Low
TCGA-A7-A0CJ-01A-21R-A00Z-07	6.3	0	0.633058534237448	High
TCGA-A2-A3Y0-01A-11R-A239-07	28.6333333333333	0	0.590426456756154	High
TCGA-AN-A0FZ-01A-11R-A034-07	0.333333333333333	0	-0.470301	Low
TCGA-BH-A0DQ-01A-11R-A084-07	3.26666666666667	0	0.30745567011288	High
TCGA-A8-A07J-01A-11R-A00Z-07	12.1666666666667	0	0.32664263256868	High
TCGA-B6-A1KC-01B-11R-A157-07	44.2	0	0.401218964435799	High
TCGA-BH-A18K-01A-11R-A12D-07	92.1	1	-0.118368	Low
TCGA-A2-A0EU-01A-22R-A056-07	24.4333333333333	0	0.389529712740692	High
TCGA-B6-A0IH-01A-11R-A115-07	98.8333333333333	1	-0.613734	Low
TCGA-A2-A0EY-01A-11R-A034-07	16.1666666666667	0	0.315034779488049	High
TCGA-AO-A0JJ-01A-11R-A056-07	50.4	0	0.033940858670679	Low
TCGA-C8-A26X-01A-31R-A16F-07	0.366666666666667	0	-0.0399297	Low
TCGA-BH-A18Q-01A-12R-A12D-07	56.4	1	0.55840871925165	High
TCGA-A8-A092-01A-11R-A00Z-07	16.2333333333333	0	0.461623929038161	High
TCGA-S3-AA12-01A-11R-A41B-07	8.63333333333333	0	0.402806245498345	High
TCGA-BH-A1EO-01A-11R-A137-07	93.2666666666667	1	0.338606995152017	High
TCGA-A7-A0DB-01C-02R-A277-07	4.7	0	0.553174354343389	High
TCGA-A2-A4RW-01A-21R-A266-07	7.4	0	0.301542159603456	High
TCGA-D8-A142-01A-11R-A115-07	2.03333333333333	0	1.18682398502566	High
TCGA-A2-A0YE-01A-11R-A109-07	8.43333333333333	0	0.69979002418032	High
TCGA-A2-A04P-01A-31R-A034-07	18.2666666666667	1	0.0560491251286028	Low
TCGA-A2-A0CY-01A-12R-A034-07	42.9333333333333	0	-0.972987	Low
TCGA-E9-A1RB-01A-11R-A157-07	0.7	0	0.439449860575656	High
TCGA-A7-A5ZW-01A-12R-A29R-07	4.46666666666667	0	-0.533566	Low
TCGA-E2-A1IN-01A-11R-A13Q-07	13.0666666666667	0	0.428044472694433	High
TCGA-EW-A6S9-01A-22R-A33J-07	15.4333333333333	0	0.692214553271389	High
TCGA-AR-A5QM-01A-11R-A27Q-07	48	0	-0.0954209	Low
TCGA-AO-A0J7-01A-11R-A034-07	8.7	0	0.349669517133495	High
TCGA-A2-A3KC-01A-11R-A213-07	12.1	0	-0.269029	Low
TCGA-E2-A15D-01A-11R-A115-07	10.5333333333333	0	0.0806214142960563	Low
TCGA-A2-A0YG-01A-21R-A109-07	13.4666666666667	0	1.47720116105132	High
TCGA-AO-A03O-01A-11R-A00Z-07	82.7666666666667	1	1.55410747054172	High
TCGA-OL-A66N-01A-12R-A31O-07	13.7666666666667	0	-1.35164	Low
TCGA-B6-A0I2-01A-11R-A034-07	127.566666666667	0	-1.29877	Low
TCGA-E2-A572-01A-13R-A31O-07	27.7	0	-1.30812	Low
TCGA-EW-A1PG-01A-11R-A144-07	29.2	0	-0.814638	Low
TCGA-A7-A26G-01A-21R-A169-07	7	0	1.15481385501251	High
TCGA-B6-A0WV-01A-11R-A109-07	80.5666666666667	1	0.666889614737633	High
TCGA-AO-A0JM-01A-21R-A056-07	60.8666666666667	0	0.120789625580692	High
TCGA-D8-A1X7-01A-11R-A14M-07	2.83333333333333	0	1.25189575643491	High
TCGA-C8-A3M8-01A-11R-A213-07	0.233333333333333	0	0.895026505124869	High
TCGA-LL-A5YN-01A-11R-A28M-07	3.7	0	-2.25275	Low
TCGA-B6-A0RG-01A-11R-A056-07	69.4	0	-0.69845	Low
TCGA-AC-A3OD-01B-06R-A22O-07	1.16666666666667	0	-0.128237	Low
TCGA-A8-A08O-01A-21R-A056-07	31.4333333333333	0	0.681486785727883	High
TCGA-A8-A07B-01A-11R-A00Z-07	33.4666666666667	0	1.30855937469158	High
TCGA-A8-A08L-01A-11R-A00Z-07	1	1	1.23593714283514	High
TCGA-E2-A15I-01A-21R-A137-07	13.7	0	-0.329332	Low
TCGA-BH-A0HQ-01A-11R-A034-07	37.3666666666667	0	0.232008387825928	High
TCGA-AR-A24V-01A-21R-A169-07	54.9333333333333	0	0.454598154980705	High
TCGA-EW-A1P1-01A-31R-A14D-07	30.6666666666667	0	-0.547181	Low
TCGA-EW-A3E8-01B-11R-A24H-07	21.5666666666667	0	-1.1011	Low
TCGA-A8-A07O-01A-11R-A00Z-07	10.1333333333333	0	1.26574608918895	High
TCGA-AN-A04D-01A-21R-A034-07	1.73333333333333	0	0.176842343747357	High
TCGA-E9-A2JT-01A-22R-A18M-07	0.766666666666667	0	-0.682867	Low
TCGA-A2-A4S3-01A-21R-A266-07	3.46666666666667	0	0.0986970988878878	Low
TCGA-AN-A0AK-01A-21R-A00Z-07	7.46666666666667	0	1.29304128619543	High
TCGA-AO-A1KO-01A-31R-A13Q-07	14.9333333333333	0	-0.800823	Low
TCGA-BH-A1ES-06A-12R-A24H-07	115.4	1	-0.175274	Low
TCGA-AR-A1AV-01A-21R-A12P-07	43.1666666666667	0	1.55780524500075	High
TCGA-A2-A0D0-01A-11R-A00Z-07	21.4333333333333	0	0.357475238163488	High
TCGA-A7-A13G-01B-04R-A22O-07	6.93333333333333	0	0.10633158470874	Low
TCGA-AC-A2QI-01A-12R-A19W-07	0.933333333333333	0	0.00472717404062244	Low
TCGA-AC-A2FM-01A-11R-A19W-07	26.4	1	0.6957366099447	High
TCGA-B6-A0X5-01A-21R-A109-07	69.9	1	1.18951153252418	High
TCGA-A7-A13G-01A-11R-A13Q-07	6.93333333333333	0	0.760442931545459	High
TCGA-AN-A0AS-01A-11R-A00Z-07	0.333333333333333	0	-0.512984	Low
TCGA-A8-A0A2-01A-11R-A034-07	19.3	0	-0.374038	Low
TCGA-LQ-A4E4-01A-11R-A266-07	16.1333333333333	0	0.885379694245196	High
TCGA-A1-A0SI-01A-11R-A144-07	21.1666666666667	0	0.142834799580307	High
TCGA-BH-A5J0-01A-11R-A27Q-07	7.5	0	-0.421373	Low
TCGA-D8-A1Y2-01A-11R-A157-07	2.43333333333333	0	0.00321102105597583	Low
TCGA-A7-A3RF-01A-11R-A22K-07	1.8	0	-0.0634666	Low
TCGA-A2-A0T5-01A-21R-A084-07	10.7	0	-0.342618	Low
TCGA-BH-A1F5-01A-12R-A13Q-07	90.4	1	0.325348549244574	High
TCGA-LD-A66U-01A-11R-A31O-07	8.4	0	-2.15292	Low
TCGA-E9-A3QA-01A-61R-A22K-07	0.633333333333333	0	-0.667305	Low
TCGA-AO-A12F-01A-11R-A115-07	49.0333333333333	0	0.679933335777417	High
TCGA-A2-A25E-01A-11R-A169-07	83.7	0	0.86141422594858	High
TCGA-A8-A0A4-01A-11R-A00Z-07	13.2	0	0.112667860008177	Low
TCGA-EW-A1J6-01A-11R-A13Q-07	19.8333333333333	0	0.140188371099373	High
TCGA-C8-A8HR-01A-11R-A36F-07	0.333333333333333	0	-0.510909	Low
TCGA-BH-A0BV-01A-11R-A00Z-07	50.6333333333333	0	0.585022051807825	High
TCGA-D8-A27T-01A-11R-A16F-07	4.53333333333333	0	-0.0523022	Low
TCGA-E9-A1RE-01A-11R-A157-07	1.56666666666667	0	0.839524352148479	High
TCGA-A2-A0T3-01A-21R-A115-07	15.2	0	0.0043295380478327	Low
TCGA-E2-A15E-01A-11R-A12D-07	17.2666666666667	0	-0.242032	Low
TCGA-B6-A0RV-01A-11R-A084-07	159.6	0	-1.39572	Low
TCGA-E2-A15P-01A-11R-A115-07	10.5	0	0.432242236769688	High
TCGA-AC-A3EH-01A-22R-A22K-07	0.566666666666667	0	0.00864277739790806	Low
TCGA-BH-A1FB-01A-11R-A13Q-07	122.3	1	0.201647208885396	High
TCGA-A8-A07C-01A-11R-A034-07	19.3333333333333	0	1.43001358117233	High
TCGA-E9-A5FK-01A-11R-A27Q-07	0.4	0	-1.80849	Low
TCGA-A2-A0CO-01A-13R-A22K-07	48.9333333333333	0	-0.893247	Low
TCGA-A8-A0A9-01A-11R-A00Z-07	13.2	0	0.0159823450818643	Low
TCGA-AQ-A54O-01A-11R-A266-07	22.1666666666667	0	-0.298708	Low
TCGA-S3-AA17-01A-11R-A41B-07	3.96666666666667	0	-1.13992	Low
TCGA-MS-A51U-01A-31R-A266-07	2.83333333333333	0	-0.392726	Low
TCGA-AC-A62V-01A-11R-A31O-07	0.0666666666666667	0	-2.96568	Low
TCGA-GI-A2C8-01A-11R-A16F-07	7.5	0	-0.234185	Low
TCGA-BH-A18S-01A-11R-A12D-07	66.9666666666667	1	0.195797795135031	High
TCGA-EW-A1P7-01A-21R-A144-07	21.1666666666667	0	-0.843319	Low
TCGA-A8-A08P-01A-11R-A00Z-07	31.4333333333333	0	0.00202362445088585	Low
TCGA-A8-A095-01A-11R-A00Z-07	42.5666666666667	0	0.598243389435465	High
TCGA-EW-A1P0-01A-11R-A144-07	37.3666666666667	0	0.68925643158039	High
TCGA-A2-A4S1-01A-21R-A266-07	12.1666666666667	0	0.0574056440091015	Low
TCGA-AR-A0U3-01A-11R-A109-07	77.2333333333333	0	0.140408762180046	High
TCGA-BH-A0EB-01A-11R-A034-07	24.8333333333333	0	0.352122299338548	High
TCGA-E9-A54Y-01A-11R-A466-07	0.233333333333333	0	-0.403156	Low
TCGA-D8-A1XU-01A-11R-A14M-07	5	0	0.806878937444147	High
TCGA-OL-A66J-01A-11R-A29R-07	55.2666666666667	0	-0.583318	Low
TCGA-EW-A1PD-01A-11R-A144-07	5.83333333333333	0	0.60534426887739	High
TCGA-BH-A0BC-01A-22R-A084-07	32.4666666666667	0	0.356276009730379	High
TCGA-D8-A1XC-01A-11R-A14D-07	2.7	0	0.687570513641924	High
TCGA-AN-A0XV-01A-11R-A109-07	5.4	0	0.485121644771175	High
TCGA-A8-A08G-01A-11R-A00Z-07	20.2333333333333	0	0.871887370117144	High
TCGA-A2-A1FW-01A-11R-A13Q-07	7.36666666666667	0	0.540762189561778	High
TCGA-LL-A5YO-01A-21R-A28M-07	3.23333333333333	0	-0.57425	Low
TCGA-E9-A1RF-01A-11R-A157-07	1.26666666666667	0	-0.219309	Low
TCGA-XX-A899-01A-11R-A36F-07	9.73333333333333	0	-0.928983	Low
TCGA-E2-A15K-06A-11R-A12P-07	1.13333333333333	0	0.396447847337108	High
TCGA-AO-A0JI-01A-21R-A056-07	39.0666666666667	0	0.236273693143143	High
TCGA-AN-A0AM-01A-11R-A034-07	0.166666666666667	0	0.81696835689405	High
TCGA-AO-A128-01A-11R-A10J-07	95.9	0	0.0823993750436883	Low
TCGA-A7-A6VX-01A-12R-A33J-07	5.63333333333333	0	0.185825113760759	High
TCGA-A2-A0CS-01A-11R-A115-07	76.6	0	-0.444386	Low
TCGA-E2-A15K-01A-11R-A12P-07	1.13333333333333	0	-0.0659745	Low
TCGA-XX-A89A-01A-11R-A36F-07	9.26666666666667	0	-0.489582	Low
TCGA-BH-A28O-01A-11R-A22K-07	10.8	0	-2.46891	Low
TCGA-B6-A401-01A-11R-A239-07	66.3	0	-2.27394	Low
TCGA-AN-A0XS-01A-22R-A109-07	0.333333333333333	0	0.47874156872038	High
TCGA-A7-A0CG-01A-12R-A056-07	5.56666666666667	0	-0.113495	Low
TCGA-A1-A0SM-01A-11R-A084-07	8.06666666666667	0	-0.140709	Low
TCGA-D8-A27R-01A-11R-A16F-07	0.966666666666667	0	0.65278942293851	High
TCGA-GM-A2DD-01A-11R-A180-07	43.6333333333333	0	-0.697684	Low
TCGA-LL-A740-01A-21R-A32P-07	4.56666666666667	0	0.135491929753109	High
TCGA-AR-A24T-01A-11R-A169-07	54	0	0.00339976426077161	Low
TCGA-BH-A0H0-01A-11R-A056-07	15.3666666666667	0	0.523561905136903	High
TCGA-A8-A09T-01A-11R-A00Z-07	19.3	0	0.363350667083094	High
TCGA-B6-A0WW-01A-11R-A109-07	18.6	1	1.22321642433993	High
TCGA-OL-A66L-01A-12R-A31O-07	31.5	0	-2.00119	Low
TCGA-A8-A0A7-01A-11R-A00Z-07	1	0	-0.0271279	Low
TCGA-A7-A4SA-01A-11R-A266-07	8.03333333333333	0	-1.21455	Low
TCGA-A2-A0EN-01A-13R-A084-07	136.266666666667	0	-0.132545	Low
TCGA-B6-A0IO-01A-11R-A034-07	111.666666666667	0	0.0668727725791815	Low
TCGA-AC-A8OQ-01A-11R-A41B-07	1.13333333333333	0	-1.59776	Low
TCGA-A7-A26J-01A-11R-A277-07	2.26666666666667	0	-0.0518281	Low
TCGA-D8-A27E-01A-11R-A16F-07	6.06666666666667	0	0.859600499493121	High
TCGA-BH-A8G0-01A-11R-A352-07	6.63333333333333	0	-1.08814	Low
TCGA-A2-A3XW-01A-11R-A239-07	40.3	0	-0.882316	Low
TCGA-BH-A0DP-01A-21R-A056-07	15.8666666666667	0	-1.71874	Low
TCGA-PE-A5DD-01A-12R-A27Q-07	65.1	0	-1.18625	Low
TCGA-OL-A66K-01A-11R-A29R-07	34.0333333333333	0	0.244385939474736	High
TCGA-BH-A1FG-01A-11R-A13Q-07	19.2333333333333	1	1.38763673401876	High
TCGA-S3-AA14-01A-11R-A41B-07	7.26666666666667	0	-0.167046	Low
TCGA-LL-A440-01A-11R-A24H-07	0.666666666666667	0	-0.501395	Low
TCGA-A2-A0SW-01A-11R-A084-07	45.5	1	0.6055015223392	High
TCGA-D8-A1XW-01A-11R-A14M-07	3.93333333333333	0	0.927879990129452	High
TCGA-B6-A2IU-01A-32R-A18M-07	161.333333333333	0	-0.514487	Low
TCGA-GM-A2DO-01A-11R-A18M-07	54.1	0	-2.29801	Low
TCGA-B6-A0IA-01A-11R-A034-07	223.966666666667	0	-0.0608536	Low
TCGA-AN-A0G0-01A-11R-A034-07	0.533333333333333	0	0.88883136236942	High
TCGA-AO-A0JG-01A-31R-A084-07	14.9666666666667	0	0.123967882888184	High
TCGA-E2-A1LH-01A-11R-A14D-07	95.8666666666667	0	-0.0677444	Low
TCGA-AN-A0FY-01A-11R-A034-07	0.333333333333333	0	0.254192502935829	High
TCGA-E2-A1L9-01A-11R-A13Q-07	12.9333333333333	0	0.237355517439176	High
TCGA-BH-A0W5-01A-11R-A109-07	18.1	0	-0.0159012	Low
TCGA-AQ-A54N-01A-11R-A266-07	2.6	0	-1.28387	Low
TCGA-GM-A3NY-01A-11R-A21T-07	24.7666666666667	0	-0.497334	Low
TCGA-A8-A09E-01A-11R-A00Z-07	31.4333333333333	0	1.08919	High
TCGA-AR-A0TX-01A-11R-A084-07	0.5	0	0.499288044107508	High
TCGA-AQ-A04J-01A-02R-A034-07	5.33333333333333	0	-0.585555	Low
TCGA-AR-A2LJ-01A-12R-A19W-07	45.3	0	-2.02742	Low
TCGA-OL-A66H-01A-11R-A29R-07	13.7666666666667	0	0.0648934144832308	Low
TCGA-AC-A23C-01A-12R-A169-07	0.966666666666667	0	0.913406006957957	High
TCGA-D8-A1XQ-01A-11R-A14M-07	5.9	0	-0.538237	Low
TCGA-E2-A156-01A-11R-A12D-07	16.0333333333333	0	-0.161589	Low
TCGA-AC-A6IV-01A-12R-A33J-07	1.2	0	-0.911876	Low
TCGA-E2-A15E-06A-11R-A12D-07	17.2666666666667	0	0.00338430263944543	Low
TCGA-D8-A1X6-01A-11R-A14M-07	7.86666666666667	0	1.08825949428357	High
TCGA-A8-A0AD-01A-11R-A056-07	38.5666666666667	0	1.11500164713698	High
TCGA-A8-A07G-01A-11R-A034-07	19.2333333333333	0	0.696831025829189	High
TCGA-C8-A130-01A-31R-A115-07	0.133333333333333	0	0.124377877779045	High
TCGA-AN-A046-01A-21R-A034-07	0.333333333333333	0	0.0182124743534275	Low
TCGA-E2-A1AZ-01A-11R-A12P-07	65.5	0	-0.155642	Low
TCGA-B6-A400-01A-11R-A239-07	7.16666666666667	0	-0.406833	Low
TCGA-Z7-A8R5-01A-42R-A41B-07	101.4	0	-1.96143	Low
TCGA-E2-A155-01A-11R-A12D-07	18.4333333333333	0	1.57026058638931	High
TCGA-E2-A109-01A-11R-A10J-07	39.0666666666667	0	0.00133396259959066	Low
TCGA-BH-A1EN-01A-11R-A13Q-07	70.9	1	1.17591330661395	High
TCGA-AR-A1AQ-01A-11R-A12P-07	43.6666666666667	0	0.332847655532885	High
TCGA-E2-A574-01A-11R-A29R-07	20.1666666666667	0	-0.0659137	Low
TCGA-A2-A1G0-01A-11R-A13Q-07	12.6666666666667	0	0.112764382227608	Low
TCGA-AC-A4ZE-01A-11R-A41B-07	5.06666666666667	0	-0.415626	Low
TCGA-AR-A24O-01A-11R-A169-07	66.6	0	0.352984996657822	High
TCGA-BH-A0AV-01A-31R-A115-07	39.3333333333333	0	0.612415457884983	High
TCGA-C8-A137-01A-11R-A115-07	1.13333333333333	0	1.55549833384328	High
TCGA-B6-A0RL-01A-11R-A084-07	82.3	1	0.704844761170332	High
TCGA-OL-A5RV-01A-12R-A28M-07	24.4333333333333	0	-0.771037	Low
TCGA-B6-A0IM-01A-11R-A034-07	127.866666666667	0	0.19435107406047	High
TCGA-B6-A0IK-01A-12R-A056-07	19.0333333333333	1	1.65398891520714	High
TCGA-B6-A0WX-01A-11R-A109-07	21.3	1	-0.184762	Low
TCGA-AR-A24H-01A-11R-A169-07	111.1	0	1.34649279197931	High
TCGA-B6-A0IQ-01A-11R-A034-07	129.066666666667	0	-1.0676	Low
TCGA-D8-A27N-01A-11R-A16F-07	4.86666666666667	0	0.793550849404038	High
TCGA-C8-A275-01A-21R-A16F-07	0.0333333333333333	0	0.996713482372255	High
TCGA-B6-A0IG-01A-11R-A034-07	148.533333333333	1	0.752683696146993	High
TCGA-E9-A243-01A-21R-A169-07	1.43333333333333	0	0.0715288129894061	Low
TCGA-D8-A1JE-01A-11R-A13Q-07	1.9	0	0.863990588394191	High
TCGA-E2-A1LE-01A-12R-A19W-07	29.3	1	0.0201945858113788	Low
TCGA-AC-A6IX-01A-12R-A32P-07	0.433333333333333	0	0.488044949799705	High
TCGA-A8-A09Q-01A-11R-A00Z-07	25.3666666666667	0	0.0234515888390276	Low
TCGA-AN-A0AL-01A-11R-A00Z-07	6.6	0	-0.741397	Low
TCGA-A2-A4RY-01A-31R-A266-07	8.93333333333333	0	-1.77291	Low
TCGA-AR-A5QQ-01A-11R-A28M-07	10.7333333333333	1	2.48680626119408	High
TCGA-D8-A140-01A-11R-A115-07	0.9	0	0.402139739237613	High
TCGA-A2-A0YH-01A-11R-A109-07	12.6333333333333	0	-0.392909	Low
TCGA-B6-A3ZX-01A-11R-A239-07	37.7333333333333	0	-0.713957	Low
TCGA-A1-A0SE-01A-11R-A084-07	44.0333333333333	0	-0.0281348	Low
TCGA-AR-A1AN-01A-11R-A12P-07	44.3333333333333	0	0.101745580515996	Low
TCGA-A8-A08R-01A-11R-A034-07	1	0	1.00623215960825	High
TCGA-OL-A5RX-01A-11R-A28M-07	17.1	0	-1.79642	Low
TCGA-AR-A2LO-01A-31R-A18M-07	21.1	0	-0.652117	Low
TCGA-BH-A0BD-01A-11R-A034-07	18.4666666666667	0	-0.0677446	Low
TCGA-AR-A24N-01A-11R-A169-07	69.1333333333333	0	0.244900765091437	High
TCGA-AR-A2LH-01A-31R-A18M-07	20.5333333333333	1	0.267792649694535	High
TCGA-AR-A1AO-01A-11R-A12P-07	44.1666666666667	0	-0.257561	Low
TCGA-BH-A1EW-01A-11R-A137-07	56.4666666666667	1	0.879689591232253	High
TCGA-BH-A0W3-01A-11R-A109-07	6	0	0.599653516098808	High
TCGA-EW-A1PF-01A-11R-A144-07	4.66666666666667	0	1.16928066959244	High
TCGA-S3-A6ZG-01A-22R-A32P-07	6.9	0	0.584157509873839	High
TCGA-A2-A0YT-01A-11R-A109-07	24.1	1	1.50068939789574	High
TCGA-B6-A0IN-01A-11R-A034-07	85.7666666666667	1	0.236647966628257	High
TCGA-C8-A1HJ-01A-11R-A13Q-07	0.166666666666667	0	1.4435498801939	High
TCGA-AQ-A7U7-01A-22R-A352-07	10.1333333333333	0	-1.52578	Low
TCGA-D8-A1JI-01A-11R-A13Q-07	0.7	0	-0.181251	Low
TCGA-GM-A2D9-01A-11R-A18M-07	60.4	1	-0.912167	Low
TCGA-A8-A06R-01A-11R-A00Z-07	18.2333333333333	0	0.70243905167615	High
TCGA-AR-A1AT-01A-11R-A12P-07	42.4	1	-0.0585991	Low
TCGA-AO-A1KP-01A-11R-A13Q-07	83.7666666666667	0	0.706235167657957	High
TCGA-AN-A0AJ-01A-11R-A00Z-07	8.13333333333333	0	0.297491687934786	High
TCGA-A8-A07F-01A-11R-A00Z-07	19.2333333333333	0	0.474234747192449	High
TCGA-GM-A3XG-01A-31R-A24H-07	32.7333333333333	0	-2.42707	Low
TCGA-AR-A0TV-01A-21R-A084-07	30.1666666666667	0	0.862513183645119	High
TCGA-A2-A3XY-01A-11R-A239-07	26.2	0	-1.03657	Low
TCGA-BH-A0DD-01A-31R-A12P-07	46.4666666666667	0	0.334336551351631	High
TCGA-A2-A1FZ-01A-51R-A14D-07	13.6666666666667	0	0.625941995835862	High
TCGA-D8-A13Z-01A-11R-A115-07	7	0	-0.262714	Low
TCGA-A2-A25C-01A-11R-A169-07	9.5	0	1.09305746123546	High
TCGA-AN-A0XR-01A-11R-A109-07	0.333333333333333	0	0.161486985061758	High
TCGA-B6-A0RN-01A-12R-A084-07	175.366666666667	0	-0.0861013	Low
TCGA-AC-A2FB-01A-11R-A17B-07	1.46666666666667	0	-0.791111	Low
TCGA-AC-A7VB-01A-11R-A352-07	2.46666666666667	0	1.26358980512525	High
TCGA-A2-A0YM-01A-11R-A109-07	22.0666666666667	0	-0.601699	Low
TCGA-OL-A5D8-01A-11R-A27Q-07	7.63333333333333	0	0.0407882372365456	Low
TCGA-D8-A1XL-01A-11R-A14M-07	10.6333333333333	0	-1.94139	Low
TCGA-AR-A252-01A-11R-A169-07	41.2	0	0.537435132359447	High
TCGA-BH-A18G-01A-11R-A12D-07	2.03333333333333	0	0.37014681725625	High
TCGA-AC-A2QH-01A-11R-A18M-07	1.03333333333333	0	1.58301568005565	High
TCGA-OL-A5D6-01A-21R-A27Q-07	12.8333333333333	0	0.245407796963889	High
TCGA-A8-A086-01A-11R-A00Z-07	13.2	0	0.687867480051335	High

## Sheet: Table S3
Table S3: Risk table for GSE42568 cohort (Overall Survival).
	time	status	riskscore	risk
GSM1045208	3026	0	0.0776418167464845	Low
GSM1045209	755	1	0.061408122212498	Low
GSM1045210	3014	0	0.057528246872105	Low
GSM1045211	1726	1	0.0232966408857057	Low
GSM1045212	2225	0	0.0611654755028703	Low
GSM1045213	285	1	0.0197212072870977	Low
GSM1045214	2138	0	0.0570494673728306	Low
GSM1045215	2449	0	0.0588113326819406	Low
GSM1045216	2456	1	0.0778937826117517	Low
GSM1045217	420	1	-0.00219275	Low
GSM1045218	1110	1	0.102017543370442	High
GSM1045219	488	1	0.10752885681325	High
GSM1045220	2718	0	0.135141531219562	High
GSM1045221	767	1	0.0769722745806867	Low
GSM1045222	1216	1	0.103147358530933	High
GSM1045223	2462	0	0.100714568077339	High
GSM1045224	1862	1	0.00289763339279818	Low
GSM1045225	1223	1	0.0441840760580778	Low
GSM1045226	3019	0	0.0728042476811277	Low
GSM1045227	155	1	0.085100016600904	High
GSM1045228	947	0	0.111229502892094	High
GSM1045229	552	1	0.0525164748061986	Low
GSM1045230	2903	0	0.1026195127161	High
GSM1045231	2438	0	0.0726174133819759	Low
GSM1045232	1627	0	0.12325250027649	High
GSM1045233	1708	1	0.102721103586084	High
GSM1045234	2237	0	0.134289535832354	High
GSM1045235	845	1	0.0811168025984043	High
GSM1045236	2957	0	0.0258901245890634	Low
GSM1045237	913	1	0.0881143604299525	High
GSM1045238	138	1	0.0795289239174043	Low
GSM1045239	1058	1	0.0934621174874262	High
GSM1045240	2759	0	0.0779550688403852	Low
GSM1045241	2764	0	0.0795509467635919	Low
GSM1045242	1157	1	0.104483800750642	High
GSM1045243	546	0	0.0542259061080705	Low
GSM1045244	2582	0	0.0467802116766068	Low
GSM1045245	2460	0	0.103741822779485	High
GSM1045246	1338	1	0.0681152292207821	Low
GSM1045247	2626	0	0.137016228922682	High
GSM1045248	2948	0	0.033447596170275	Low
GSM1045249	2416	0	0.107527091981617	High
GSM1045250	194	1	0.0872043187673054	High
GSM1045251	2897	0	0.104717400469644	High
GSM1045252	2899	0	0.0457645750688259	Low
GSM1045253	2829	0	0.0623758639439246	Low
GSM1045254	2785	0	0.0964750417813073	High
GSM1045255	2740	0	0.0864873527328911	High
GSM1045256	1235	0	0.108302381463401	High
GSM1045257	2092	1	0.120879230536631	High
GSM1045258	2535	0	0.0713110651911277	Low
GSM1045259	2211	0	0.0594785443157439	Low
GSM1045260	2275	1	0.102015329490578	High
GSM1045261	390	1	0.100884085092148	High
GSM1045262	2184	0	0.0975350648275806	High
GSM1045263	919	1	0.0698467354310223	Low
GSM1045264	917	0	0.0450702801778136	Low
GSM1045265	2758	0	0.0661739909964715	Low
GSM1045266	977	0	0.0695132399420261	Low
GSM1045267	1997	0	0.0714089705799757	Low
GSM1045268	1854	0	0.132583985175236	High
GSM1045269	1793	0	0.0821224372021621	High
GSM1045270	545	1	0.125388397087409	High
GSM1045271	1409	1	0.111503858009896	High
GSM1045272	2943	0	0.0930455391877722	High
GSM1045273	1044	1	0.112129613703722	High
GSM1045274	2489	0	0.102707171969283	High
GSM1045275	1332	1	0.134839588844586	High
GSM1045276	1915	1	0.0766111140431489	Low
GSM1045277	1950	0	0.113823790943531	High
GSM1045278	1080	1	0.0652622073352347	Low
GSM1045279	2266	0	0.0599220326481501	Low
GSM1045280	1692	0	0.0731588550959431	Low
GSM1045281	2302	0	0.129405268444107	High
GSM1045282	365	1	0.0268951941462835	Low
GSM1045283	2211	0	0.0972887357948606	High
GSM1045284	2344	0	0.125348634350825	High
GSM1045285	1864	0	0.0887912711456284	High
GSM1045286	2484	0	0.0717700678258442	Low
GSM1045287	526	1	0.0555564885641439	Low
GSM1045288	2955	0	0.0118825162322424	Low
GSM1045289	2650	0	0.0769997923342257	Low
GSM1045290	2384	0	0.0991395972766426	High
GSM1045291	2689	0	0.132129170809605	High
GSM1045292	2641	0	0.0790478741832116	Low
GSM1045293	423	0	0.0584389386793703	Low
GSM1045294	1682	0	0.071377042070829	Low
GSM1045295	2052	0	0.0639686133403727	Low
GSM1045296	475	0	0.100996997877909	High
GSM1045297	2243	0	0.125212916510168	High
GSM1045298	2197	0	0.0747422068306376	Low
GSM1045299	2576	0	0.079606131879176	Low
GSM1045300	2556	0	0.0745817020328836	Low
GSM1045301	2225	0	0.019267593462395	Low
GSM1045302	2022	1	0.010813726477612	Low
GSM1045303	2713	0	0.0820216591033936	High
GSM1045304	2790	0	0.0684491300915601	Low
GSM1045305	2622	0	0.0802501599481395	Low
GSM1045306	2909	0	0.0822020901360969	High
GSM1045307	2952	0	0.061181016689741	Low
GSM1045308	2989	0	0.0946286377633902	High
GSM1045309	2105	0	0.0887133579531531	High
GSM1045310	927	1	0.108074585094013	High
GSM1045311	2962	0	0.072859040323684	Low
